# Supplementary material for: Benchmarking protein structure predictors to assist machine learning-guided peptide discovery
Source: Royal Society of Chemistry journal article supplement (doi:10.1039/d3dd00045a), 2023-01-01
Supplement: d3dd00045a1.pdf [file d3dd00045a1.pdf]

## Supplementary Information

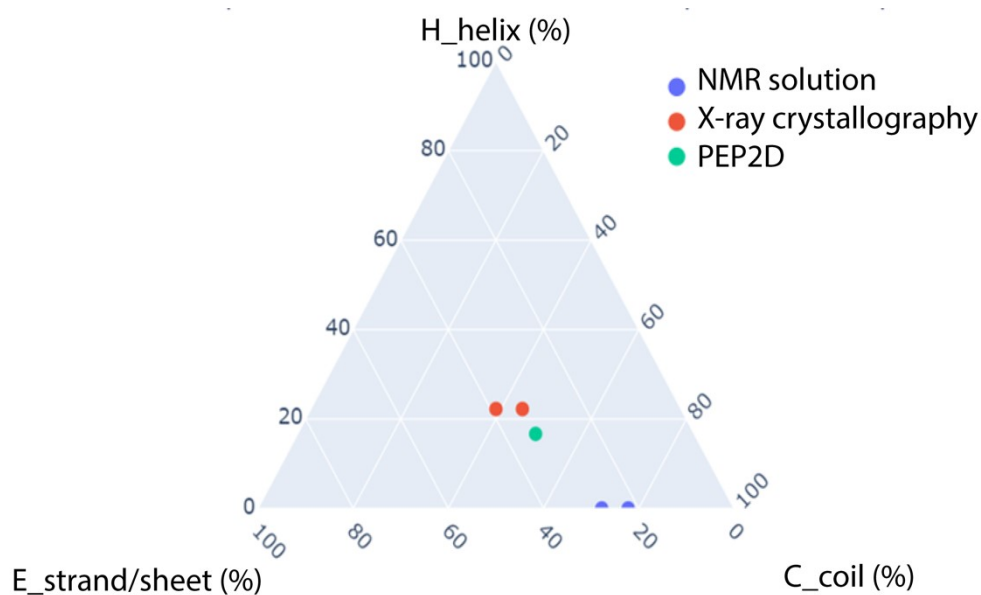

**Figure S1.** Differences in secondary structures annotations for PDBe structures corresponding to the same sequence under different experimental conditions. For example, five tridimensional structures of Human Beta-Defensin 1 – Nuclear Magnetic Resonance (NMR) solution structures 1KJ5 and 1E4S, X-ray crystal structures 1IJU and 1IJV, and secondary structure prediction using PEP2D.

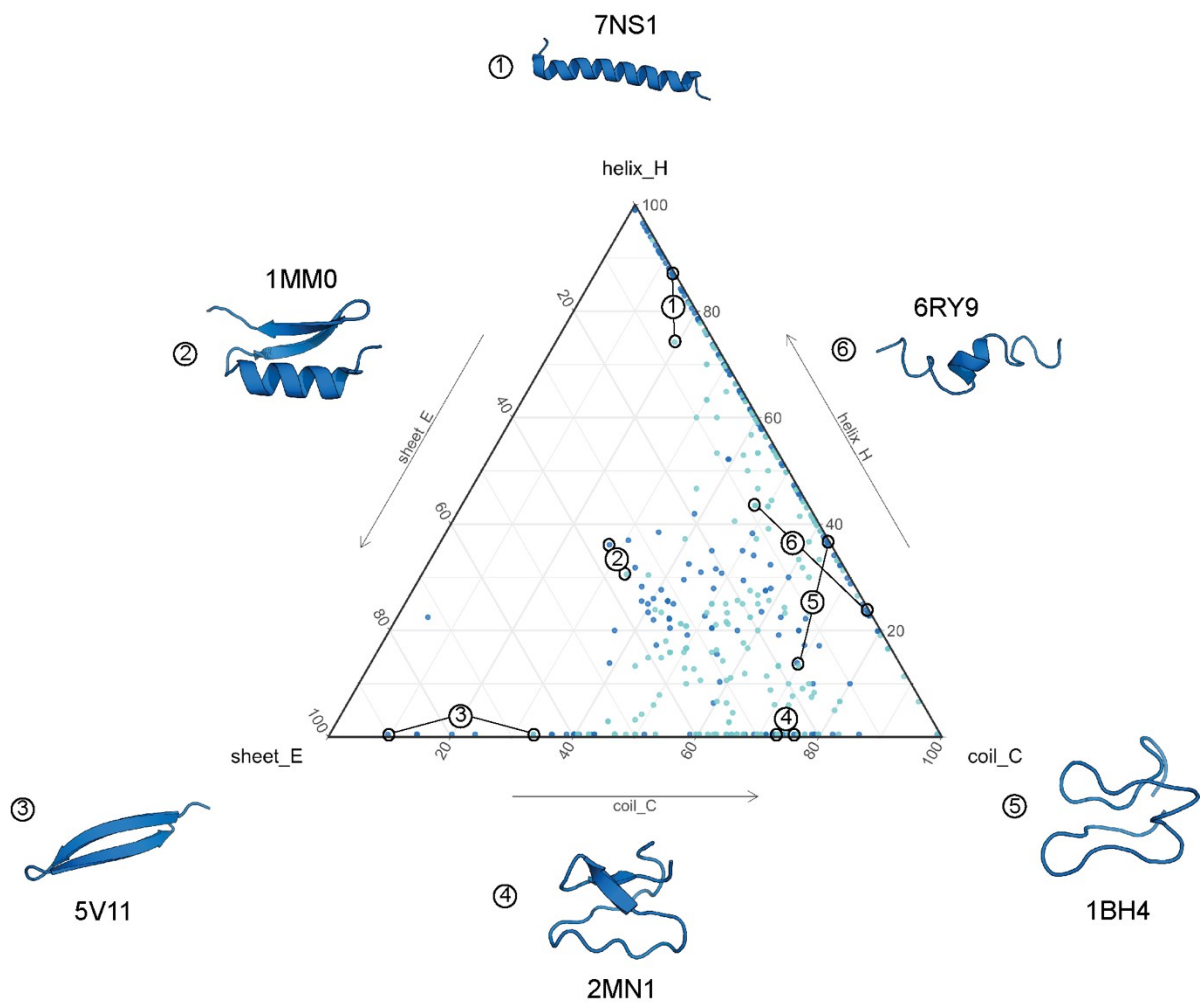

**Figure S2.** Ternary plot illustrating the secondary structure compositions for the 261 GRAMPA-related PDB structures as ground truth (blue) and their corresponding PEP2D predictions (cyan). The following six examples serve as structural markers; (1) pepG1 (PDB ID: 7NS1), (2) termicin (1MM0), (3) synthetic arenicin-3 analogue (5V11), (4) kalata B1[W23WW] (2MN1), (5) circulin A (1BH4) and (6) pleurocidin-like peptide 1a-1 (6RY9). The lines indicate the error between the three-state secondary structures (H, E, C) measured between PEP2D predictions and corresponding experimental references.

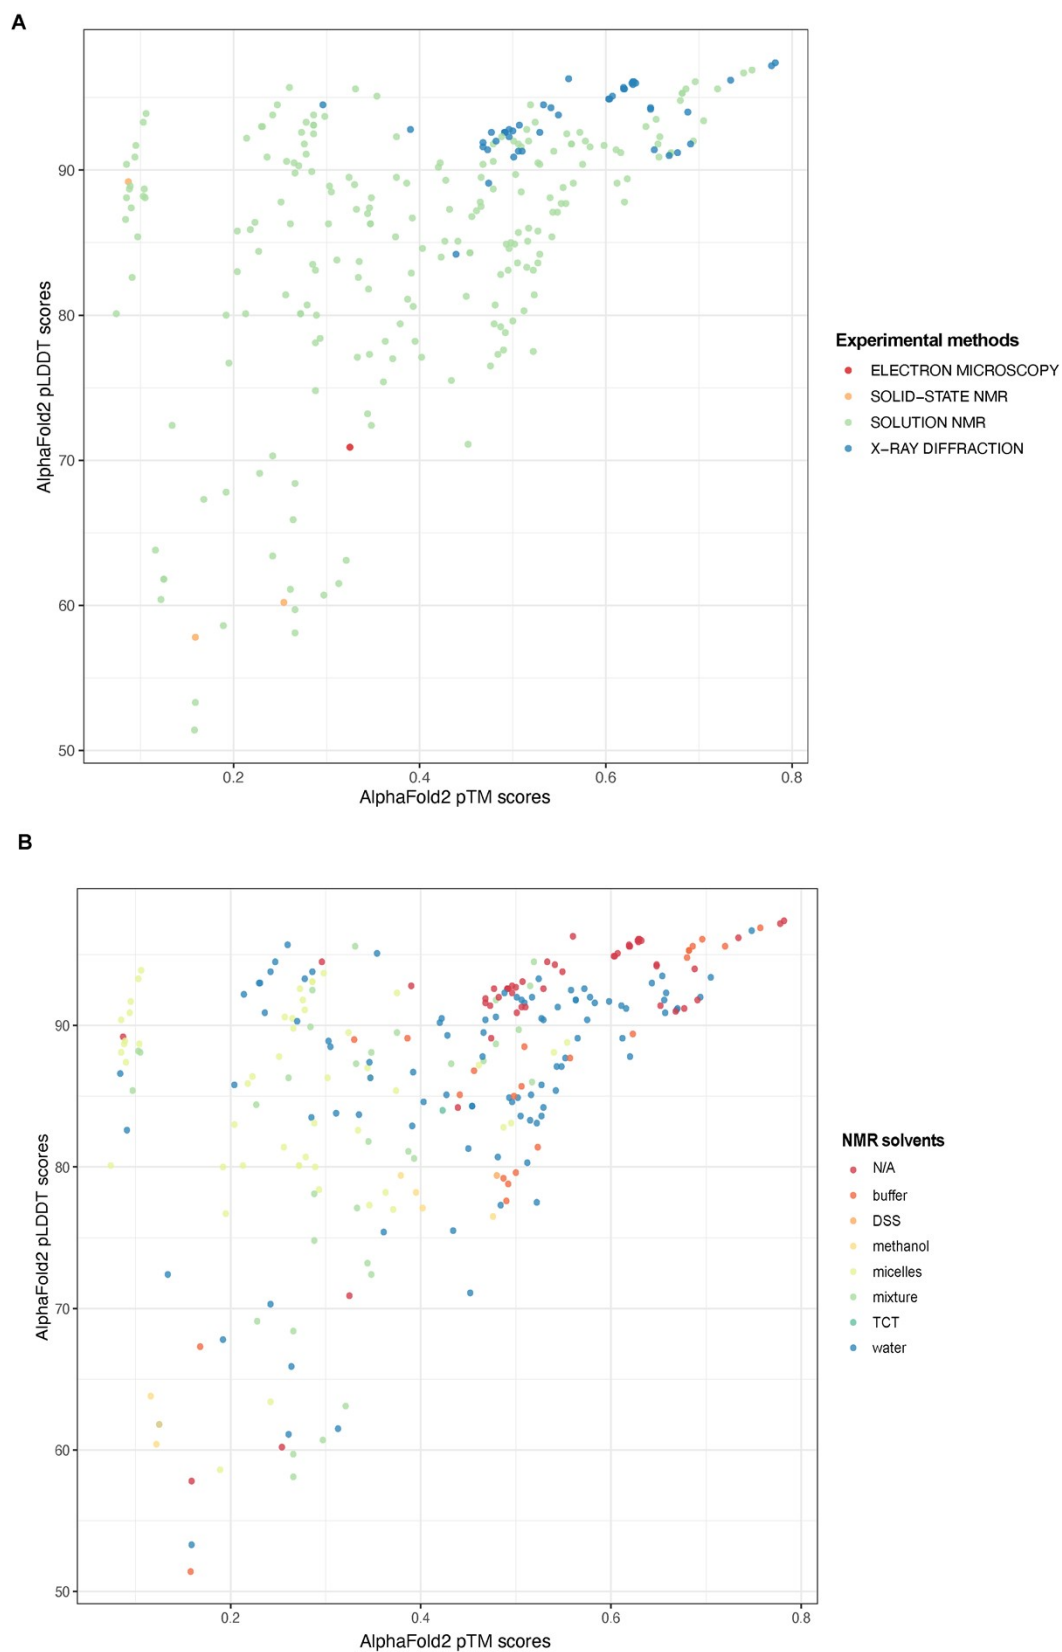

**Figure S3.** AlphaFold2 predictions for the 261 GRAMPA-related sequences. Scatterplot showing the corresponding predicted local distance difference test (pLDDT) and predicted template modelling (pTM) scores for all best models (rank<sub>1</sub>) grouped by the used experimental methods (A) and different NMR solvents (B).

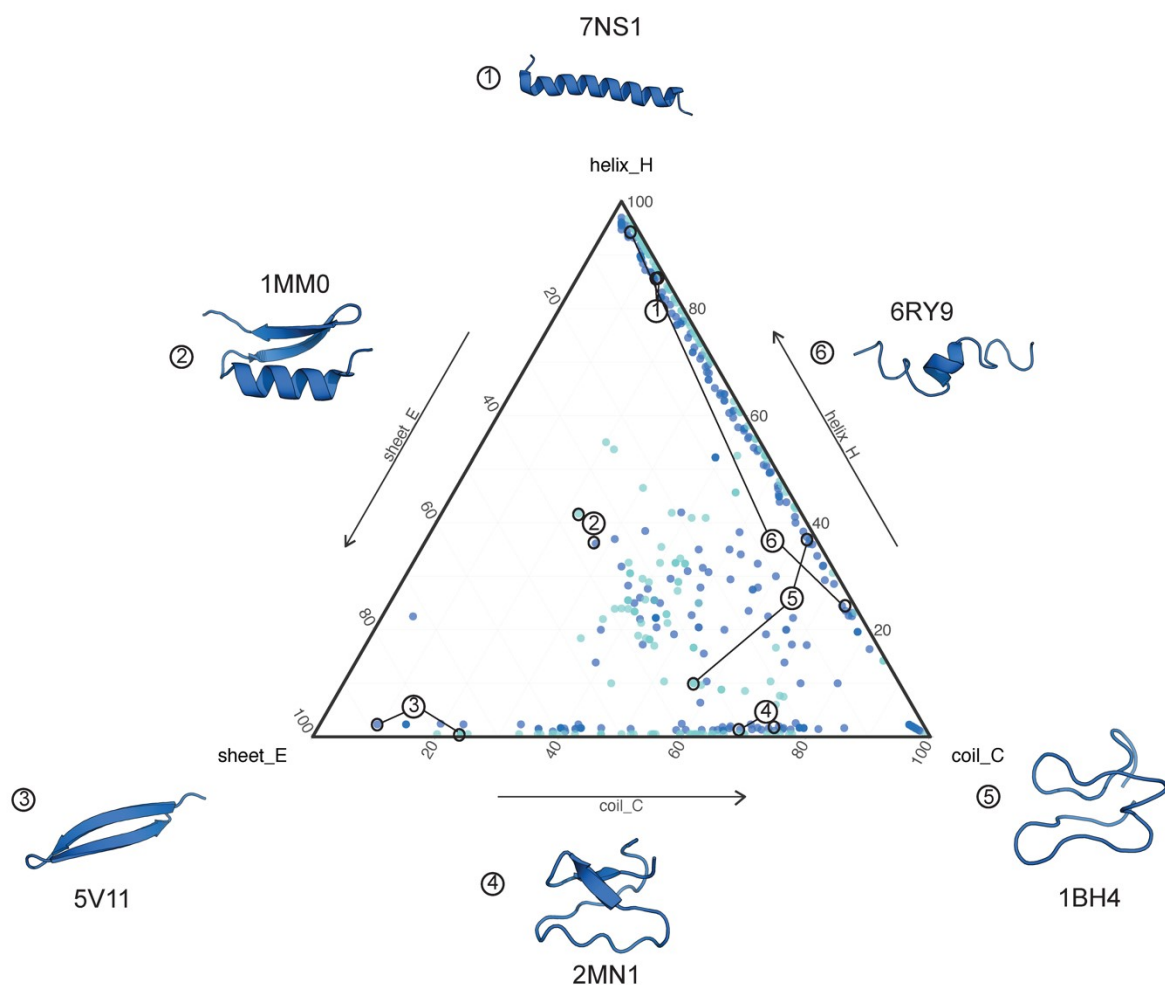

**Figure S4.** Ternary plot illustrating the secondary structure compositions for the 261 GRAMPA-related PDB structures as ground truth (blue) and their corresponding AlphaFold2 predictions (cyan). The following six examples serve as structural markers; (1) pepG1 (PDB ID: 7NS1), (2) termicin (1MM0), (3) synthetic arenicin-3 analogue (5V11), (4) kalata B1[W23WW] (2MN1), (5) circulin A (1BH4) and (6) pleurocidin-like peptide 1a-1 (6RY9). The lines indicate the error between the three-state secondary structures (H, E, C) measured between PEP2D predictions and corresponding experimental references.

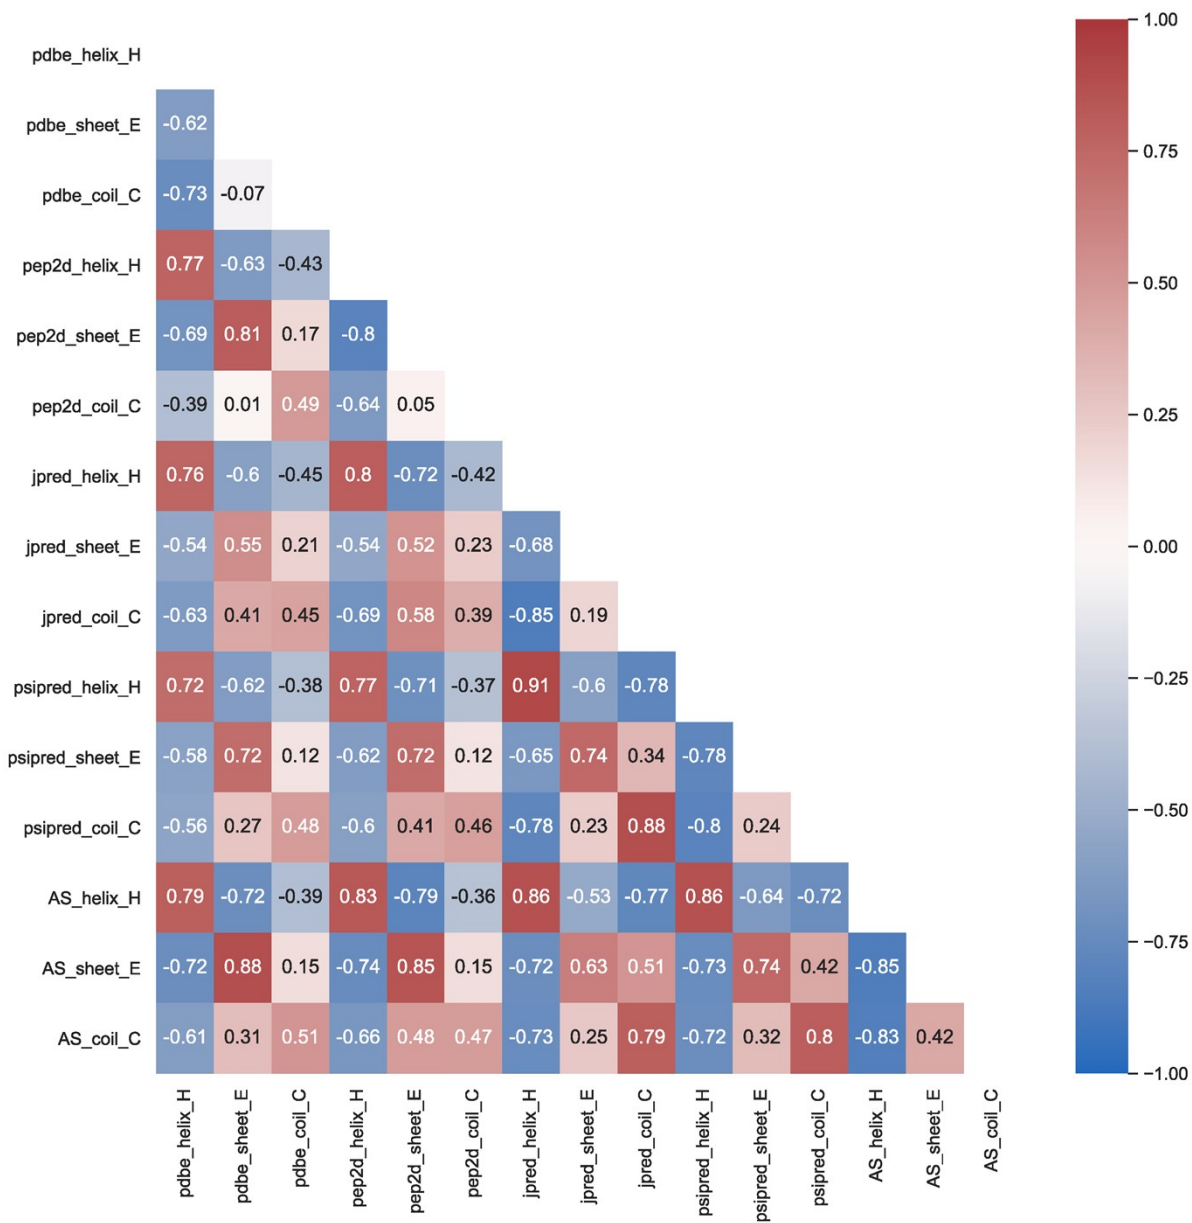

**Figure S5.** Pearson correlation coefficients between the secondary structure compositions from the PDBE structures (as ground truth) and the protein structure predictions (PEP2D, for the 261 GRAMPA sequences/structures).
