# Supplementary material for: Benchmarking protein structure predictors to assist machine learning-guided peptide discovery
Source: Royal Society of Chemistry journal article supplement (doi:10.1039/d3dd00045a), 2023-01-01
Supplement: d3dd00045a2.csv [file d3dd00045a2.csv]

	peptide_sequence	pdb_id	title	method	general_solvent_conditions	specific_solvent_conditions
1	AVVKVPLKKFKSIRETMKEKGLLGEF	1avf		X-RAY DIFFRACTION	N/A	N/A
2	CGESCVWIPCISAALGCSCKNKVCYRNGIP	1bh4	CIRCULIN A FROM CHASSALIA PARVIFLORA, NMR, 12 STRUCTURES	SOLUTION NMR	water	Water
3	LCNERPSQTWSGNCGNTAHCDKQCQDWEKASHGACHKRENHWKCFCYFNC	1bk8	DETERMINATION OF THE THREE-DIMENSIONAL SOLUTION STRUCTURE OF AESCULUS HIPPOCASTANUM ANTIMICROBIAL PROTEIN 1 (AH-AMP1) BY 1H NMR, 25 STRUCTURES	SOLUTION NMR	water	Water
4	APLSCGRNGGVCIPIRCPVPMRQIGTCFGRPVKCCRSW	1bnb	SOLUTION STRUCTURE OF BOVINE NEUTROPHIL BETA-DEFENSIN 12: THE PEPTIDE FOLD OF THE BETA-DEFENSINS IS IDENTICAL TO THAT OF THE CLASSICAL DEFENSINS	SOLUTION NMR	water	Water
5	YSRCQLQGFNCVVRSYGLPTIPCCRGLTCRSYFPGSTYGRCQRY	1cix	THREE-DIMENSIONAL STRUCTURE OF ANTIMICROBIAL PEPTIDE TACHYSTATIN A ISOLATED FROM HORSESHOE CRAB	SOLUTION NMR	water	Water
6	VNYGNGVSCSKTKCSVNWGQAFQERYTAGINSFVSGVASGAGSIGRRP	1cw5	SOLUTION STRUCTURE OF CARNOBACTERIOCIN B2	SOLUTION NMR	mixture	Water:TFE mixture
7	RSVCRQIKICRRRGGCYYKCTNRPY	1cz6	SOLUTION STRUCTURE OF ANDROCTONIN	SOLUTION NMR	water	Water
8	DCYCRIPACIAGERRYGTCIYQGRLWAFCC	1dfn		X-RAY DIFFRACTION	N/A	N/A
9	AGCIKNGGRCNASAGPPYCCSSYCFQIAGQSYGVCKNR	1dkc	SOLUTION STRUCTURE OF PAFP-S, AN ANTIFUNGAL PEPTIDE FROM THE SEEDS OF PHYTOLACCA AMERICANA	SOLUTION NMR	DSS	Sodium 4,4-dimethyl-4-silapentane-1-sulfonate
10	GIGKYLHSAKKFGKAWVGEIMNS	1dum	NMR STRUCTURE OF [F5Y, F16W] MAGAININ 2 BOUND TO PHOSPHOLIPID VESICLES	SOLUTION NMR	micelles	DPC micelles
11	PVTCLKSGAICHPVFCPRRYKQIGTCGLPGTKCCKKP	1e4q	Solution structure of the human defensin hBD-2	SOLUTION NMR	water	Water
12	YPSKPDNPGEDAPAEDLARYYSALRHYINLITRQRY	1f8p	PORCINE NEUROPEPTIDE Y BOUND TO DPC MICELLES	SOLUTION NMR	micelles	DPC micelles
13	GFGCPNNYQCHRHCKSIPGRCGGYCGGWHRLRCTCYRCG	1fjn	SOLUTION STRUCTURE AND ACTIVITY OF THE FOUR DISULFIDE BOND MEDITERRANEAN MUSSEL DEFENSIN MGD-1	SOLUTION NMR	water	Water
14	RGLRRLGRKIAHGVKKYGPTVLRIIRIAG	1fry	THE SOLUTION STRUCTURE OF SHEEP MYELOID ANTIMICROBIAL PEPTIDE, RESIDUES 1-29 (SMAP29)	SOLUTION NMR	mixture	Water:TFE mixture
15	YPSKPDNPGEDAPAEDLARYYSALRHYINLAARQRY	1fvn	[ALA31, AIB32]-NEUROPEPTIDE Y	SOLUTION NMR	water	Water
16	DKLIGSCVWGAVNYTSDCNGECKRRGYKGGHCGSFANVNCWCET	1i2u	NMR SOLUTION STRUCTURES OF ANTIFUNGAL HELIOMICIN	SOLUTION NMR	buffer	Sodium acetate buffer
17	DKLIGSCVWGAVNYTSDCNGECLLRGYKGGHCGSFANVNCWCET	1i2v	NMR SOLUTION STRUCTURES OF AN ANTIFUNGAL AND ANTIBACTERIAL MUTANT OF HELIOMICIN	SOLUTION NMR	buffer	Sodium acetate buffer
18	ATCDLLSGTGINHSACAAHCLLRGNRGGYCNGKGVCVCRN	1ica	REFINED THREE-DIMENSIONAL STRUCTURE OF INSECT DEFENSIN A	SOLUTION NMR	water	Water
19	YPSKPDNPGEDAPAEDLARYYSALRHYINLAPRQRY	1icy	[ALA31,PRO32]-PNPY BOUND TO DPC MICELLES	SOLUTION NMR	micelles	DPC micelles
20	ELPKLPDDKVLIRSRSNCPKGKVWNGFDCKSPFAFS	1iyc	Solution structure of antifungal peptide, scarabaecin	SOLUTION NMR	water	Water
21	KTCEHLADTYRGVCFTNASCDDHCKNKAHLISGTCHNWKCFCTQNC	1jkz	NMR Solution Structure of Pisum sativum defensin 1 (Psd1)	SOLUTION NMR	buffer	Sodium phosphate buffer
22	KSCCPNTTGRNIYNTCRFGGGSRQVCASLSGCKIISASTCPSDYPK	1jmn	Solution Structure of the Viscotoxin A2	SOLUTION NMR	water	Water
23	KSCCPNTTGRNIYNTCRLGGGSRERCASLSGCKIISASTCPSDYPK	1jmp	Solution Structure of the Viscotoxin B	SOLUTION NMR	water	Water
24	GIINTLQKYYCRVRGGRCAVLSCLPKEEQIGKCSTRGRKCCRRKK	1kj6	Solution Structure of Human beta-Defensin 3	SOLUTION NMR	water	Water
25	AKIPIKAIKTVGKAVGKGLRAINIASTANDVFNFLKPKKRKA	1kv4	Solution structure of antibacterial peptide (Moricin)	SOLUTION NMR	methanol	Methanol
26	ATCDLLSGTGINHSACAAHCLLRGNRGGYCNGKAVCVCRN	1l4v	SOLUTION STRUCTURE OF SAPECIN	SOLUTION NMR	methanol	Methanol
27	FKCRRWQWRMKKLGAPSITCVRRAF	1lfc	BOVINE LACTOFERRICIN (LFCINB), NMR, 20 STRUCTURES	SOLUTION NMR	water	Water
28	GCLEFWWKCNPNDDKCCRPKLKCSKLFKLCNFSF	1lu8	Solution structure of GsMTx-4	SOLUTION NMR	water	Water
29	SSMKLSFRARAYGFRGPGPQL	1lv4	Human catestatin 21-mer	SOLUTION NMR	water	Water
30	GLRKRLRKFRNKIKEKLKKIGQKIQGLLPKLA	1lyp	THE SOLUTION STRUCTURE OF THE ACTIVE DOMAIN OF CAP18: A LIPOPOLYSACCHARIDE BINDING PROTEIN FROM RABBIT LEUKOCYTES	SOLUTION NMR	water	Water
31	ICIFCCGCCHRSKCGMCCKT	1m4e	Solution Structure of Hepcidin-20	SOLUTION NMR	water	Water
32	ACNFQSCWATCQAQHSIYFRRAFCDRSQCKCVFVRG	1mm0	Solution structure of termicin, an antimicrobial peptide from the termite Pseudacanthotermes spiniger	SOLUTION NMR	water	Water
33	VGECVRGRCPSGMCCSQFGYCGKGPKYCGR	1mmc	1H NMR STUDY OF THE SOLUTION STRUCTURE OF AC-AMP2	SOLUTION NMR	water	Water
34	DCLSGRYKGPCAVWDNETCRRVCKEEGRSSGHCSPSLKCWCEGC	1myn	SOLUTION STRUCTURE OF DROSOMYCIN, THE FIRST INDUCIBLE ANTIFUNGAL PROTEIN FROM INSECTS, NMR, 15 STRUCTURES	SOLUTION NMR	water	Water
35	KYYGNGVHCGKHSCTVDWGTAIGCIGNNAAANWATGGNAGWNKC	1ohm	Sakacin P variant that is structurally stabilized by an inserted C-terminal disulfide bridge.	SOLUTION NMR	micelles	DPC micelles
36	VCGETCVGGTCNTPGCTCSWPVCT	1orx	Solution Structure of the acyclic permutant des-(24-28)-kalata B1.	SOLUTION NMR	water	Water
37	DKLIGSCVWGAVNYTSNCNAECKRRGYKGGHCGSFANVNCWCET	1ozz	NMR structure of antifungal defensin ARD1 from Archaeoprepona demophon	SOLUTION NMR	buffer	Sodium acetate buffer
38	DKLIGSCVWGAVNYTSNCRAECKRRGYKGGHCGSFANVNCWCET	1p00	NMR structure of ETD151, mutant of the antifungal defensin ARD1 from Archaeoprepona demophon	SOLUTION NMR	buffer	Sodium acetate buffer
39	DKLIGSCVWGAVNYTSNCNAECKRRGYKGGHCGSFLNVNCWCET	1p0a	NMR structure of ETD135, mutant of the antifungal defensin ARD1 from Archaeoprepona demophon	SOLUTION NMR	buffer	Sodium acetate buffer
40	AKKVFKRLEKLFSKIQNDK	1p0g	Structure of Antimicrobial Peptide, HP (2-20) and its Analogues Derived from Helicobacter pylori, as Determined by 1H NMR Spectroscopy	SOLUTION NMR	micelles	SDS micelles
41	AKKVFKRLEKLFSKIWNDK	1p0l	HP (2-20) Substitution GLN To TRP Modification In SDS-D25 MICELLES	SOLUTION NMR	micelles	SDS micelles
42	AKKVFKRLEKLFSKIWNWK	1p0o	HP (2-20) substitution of Trp for Gln and Asp at position 17 and 19 MODIFICATION IN SDS-D25 MICELLES	SOLUTION NMR	micelles	SDS micelles
43	AKKVFKRLEKSFSKIQNDK	1p5k	HP (2-20) Substitution SER to LEU11 modification in sds-d25 micelles	SOLUTION NMR	micelles	SDS micelles
44	AKKVSKRLEKLFSKIQNDK	1p5l	HP (2-20) Substitution PHE5 to SER modification in sds-d25 micelles	SOLUTION NMR	micelles	SDS micelles
45	NKGCATCSIGAACLVDGPIPDFEIAGATGLFGLWG	1pxq	Structure of Subtilisin A	SOLUTION NMR	micelles	SDS micelles
46	CIKNGNGCQPNGSQGNCCSGYCHKQPGWVAGYCRRK	1q3j	Solution structure of ALO3: a new knottin-type antifungal peptide from the insect Acrocinus longimanus	SOLUTION NMR	buffer	Sodium acetate buffer
47	YPSKPDNPGEDAPAEDMARYYSALRHYINLITRQRY	1ron	NMR SOLUTION STRUCTURE OF HUMAN NEUROPEPTIDE Y	SOLUTION NMR	water	Water
48	GCRFCCNCCPNMSGCGVCCRF	1s6w	Solution Structure of hybrid white striped bass hepcidin	SOLUTION NMR	water	Water
49	RTCMIKKEGWGKCLIDTTCAHSCKNRGYIGGNCKGMTRTCYCLVNC	1ti5	Solution structure of plant defensin	SOLUTION NMR	water	Water
50	GCLEFWWKCNPNDDKCCRPKLKCSKLFKLCNFSF	1tyk	SOLUTION STRUCTURE OF A TOXIN FROM THE TARANTULA, GRAMMOSTOLA SPATULATA, WHICH INHIBITS MECHANOSENSITIVE ION CHANNELS	SOLUTION NMR	water	Water
51	YPSKPDNPGEDAPAEDLAQYAADLRHYINLITRQRY	1tz4	[hPP19-23]-pNPY bound to DPC Micelles	SOLUTION NMR	micelles	DPC micelles
52	EIAALEKEIAALEKEIAALEK	1u0i	IAAL-E3/K3 heterodimer	SOLUTION NMR	mixture	Water:TFE mixture
53	SFGLCRLRRGFCARGRCRFPSIPIGRCSRFVQCCRRVW	1ut3	Solution Structure of Spheniscin-2, a beta-Defensin from Penguin Stomach Preserving Food	SOLUTION NMR	water	Water
54	CAESCVWIPCTVTALLGCSCSNKVCYNGIP	1vb8	solution structure of vhr1, the first cyclotide from root tissue	SOLUTION NMR	mixture	Water:Acetonitrile mixture
55	ASIVKTTIKAAKKLCRGFTLTCGCHFTGKK	1w9n	Isolation and characterization of epilancin 15X, a novel antibiotic from a clinical strain of Staphylococcus epidermidis	SOLUTION NMR	water	Water
56	GKIPVKAIKKAGAAIGKGLRAINIASTAHDVYSFFKPKHKKK	1x22	Solution structure of a novel moricin analogue, an antibacterial peptide from a lepidopteran insect, Spodoptera litura	SOLUTION NMR	methanol	Methanol
57	HSSGYTRPLRKPSRPIFIRPIGCDVCYGIPSSTARLCCFRYGDCCHL	1xv3	NMR structure of the synthetic penaeidin 4	SOLUTION NMR	water	Water
58	KSSAYSLQMGATAIKQVKKLFKKWGW	1ytr	NMR structure of plantaricin a in dpc micelles, 20 structures	SOLUTION NMR	micelles	DPC micelles
59	GWGSFFKKAAHVGKHVGKAALTHYL	1z64	NMR Solution Structure of Pleurocidin in DPC Micelles	SOLUTION NMR	micelles	DPC micelles
60	VCSCRLVFCRRTELRVGNCLIGGVSFTYCCTRV	1zmm		X-RAY DIFFRACTION	N/A	N/A
61	VGECVRGRCPSGMCCSQFGFCGKGPKYCGR	1znt	18 NMR structures of AcAMP2-Like Peptide with non Natural Fluoroaromatic Residue (AcAMP2F18Pff/Y20Pff) complex with N,N,N-triacetylchitotriose	SOLUTION NMR	TCT	N,N,N-triacetylchitotriose
62	RGFRKHFNKLVKKVKHTISETAHVAKDTAVIAGSGAAVVAAT	1zrx	solution structure of stomoxyn in H20/TFE 50%	SOLUTION NMR	mixture	Water:TFE mixture
63	VGECVRGRCPSGMCCSQWGYCGKGPKYCGR	1zuv	24 NMR structures of AcAMP2-Like Peptide with Phenylalanine 18 mutated to Tryptophan	SOLUTION NMR	buffer	Sodium phosphate buffer
64	VGECVRGRCPSGMCCSQAGYCGKGPKYCGR	1zwu	30 NMR structures of AcAMP2-like peptide with non natural beta-(2-naphthyl)-alanine residue.	SOLUTION NMR	buffer	Sodium phosphate buffer
65	ARSYGNGVYCNNKKCWVNRGEATQSIIGGMISGWASGLAGM	2a2b	Curvacin A	SOLUTION NMR	micelles	DPC micelles
66	RVKRVWPLVIRTVIAGYNLYRAIKKK	2amn	Solution structure of Fowlicidin-1, a novel Cathelicidin antimicrobial peptide from chicken	SOLUTION NMR	mixture	Water:TFE mixture
67	RRWCFRVCYRGRFCYRKCR	2b5k	PV5 NMR solution structure in DPC micelles	SOLUTION NMR	micelles	DPC micelles
68	GFGCPGNQLKCNNHCKSISCRAGYCDAATLWLRCTCTDCNGKK	2b68	Solution structure of the recombinant Crassostrea gigas defensin	SOLUTION NMR	water	Water
69	YVSCLFRGARCRVYSGRSCCFGYYCRRDFPGSIFGTCSRRNF	2dcv	The solution structure of horseshoe crab antimicrobial peptide tachystatin b with the inhibitory cystine-knot motif	SOLUTION NMR	water	Water
70	YITCLFRGARCRVYSGRSCCFGYYCRRDFPGSIFGTCSRRNF	2dcw	The solution structure of horseshoe crab antimicrobial peptide tachystatin b with the inhibitory cystine-knot motif	SOLUTION NMR	water	Water
71	YPIKPEAPGEDASPEELNRYYASLRHYLNLVTRQRY	2dez	Structure of human PYY	SOLUTION NMR	water	Water
72	IKPEAPGEDASPEELNRYYASLRHYLNLVTRQRY	2df0	Solution structure of human PYY3-36	SOLUTION NMR	water	Water
73	ATCDLASKWNWNHTLCAAHCIARRYRGGYCNSKAVCVCRN	2e3g	NMR structure of DEF-DAA, a mutant of anopheles defensin DEF-AAA	SOLUTION NMR	buffer	Sodium acetate buffer
74	CGESCVFIPCISTLLGCSCKNKVCYRNGVIP	2eri	Solution structure of circulin B	SOLUTION NMR	mixture	Water:Acetonitrile mixture
75	IGKEFKRIVQRIKDFLRNLVPRTES	2fcg	Solution structure of the C-terminal fragment of human LL-37	SOLUTION NMR	micelles	SDS micelles
76	SAISCGETCFKFKCYTPRCSCSYPVCK	2fqa	Violacin A	SOLUTION NMR	water	Water
77	GILDTLKQFAKGVGKDLVKGAAQGVLSTVSCKLAKTC	2g9l	The High-resolution Solution Conformation of an Antimicrobial Peptide Gaegurin 4 and Its Mode of Membrane Interaction	SOLUTION NMR	mixture	Water:Methanol mixture
78	GLFGKLIKKFGRKAISYAVKKARGKH	2g9p	NMR structure of a novel antimicrobial peptide, latarcin 2a, from spider (Lachesana tarabaevi) venom	SOLUTION NMR	micelles	SDS micelles
79	LVQRGRFGRFLRKIRRFRPKVTITIQGSARF	2gdl	Fowlicidin-2: NMR structure of antimicrobial peptide	SOLUTION NMR	mixture	Water:TFE mixture
80	KTCENLANTYRGPCFTTGSCDDHCKNKEHLRSGRCRDDFRCWCTRNC	2gl1	NMR solution structure of Vigna radiata Defensin 2 (VrD2)	SOLUTION NMR	buffer	Sodium phosphate buffer
81	KRFWPLVPVAINTVAAGINLYKAIRRK	2hfr	solution structure of antimicrobial peptide Fowlicidin 3	SOLUTION NMR	mixture	Water:TFE mixture
82	SGSLSTFFRLFNRSFTQALGK	2i2j	NMR structure of UA159sp in TFE	SOLUTION NMR	mixture	Water:TFE mixture
83	KWKVFKKIEKKWKVFKKIEKAGPKWKVFKKIEK	2igr	Solution structure of CB1a, a novel anticancer peptide derived from natural antimicrobial peptide cecropin B	SOLUTION NMR	mixture	Water:HFP mixture
84	GVCPKILKKCRRDSDCPGACICRGNGYCG	2it8	Solution structure of a linear analog of the cyclic squash trypsin inhibitor MCoTI-II	SOLUTION NMR	water	Water
85	FLSLIPHAINAVSTLVHHF	2jpy	Phylloseptin-2	SOLUTION NMR	mixture	Water:TFE mixture
86	FLSLIPHAINAVSAIAKHN	2jq0	Phylloseptin-1	SOLUTION NMR	mixture	Water:TFE mixture
87	FLSLIPHAINAVSALANHG	2jq1	Phylloseptin-3	SOLUTION NMR	mixture	Water:TFE mixture
88	GKIPVKAIKQAGKVIGKGLRAINIAGTTHDVVSFFRPKKKKH	2jr8	Solution structure of Manduca sexta moricin	SOLUTION NMR	methanol	Methanol
89	RWCVYAYVRVRGVLVRYRRCW	2jsb	Solution structure of arenicin-1	SOLUTION NMR	water	Water
90	CGETCTLGTCYTQGCTCSWPICKRNGLPV	2jwm	NMR spatial srtucture of ternary complex kalata B7/Mn2+/DPC micelle	SOLUTION NMR	micelles	DPC Micelles
91	GILSSFKGVAKGVAKDLAGKLLETLKCKITGC	2k10	Confirmational analysis of the broad-spectrum antibacterial peptide, rantuerin-2csa: identification of a full length helix-turn-helix motif	SOLUTION NMR	water	Water
92	RRTCHCRSRCLRRESNSGSCNINGRIFSLCCR	2k1i	Synthesis, Structure and Activities of an Oral Mucosal Alpha-Defensin from Rhesus Macaque	SOLUTION NMR	mixture	Water:TFE mixture
93	GFGALFKFLAKKVAKTVAKQAAKQGAKYVVNKQME	2k38	Cupiennin 1A, NMR, minimized average structure	SOLUTION NMR	mixture	Water:TFE mixture
94	GVPICGETCTLGTCYTAGCSCSWPVCTRN	2k7g	Solution Structure of varv F	SOLUTION NMR	water	Water
95	GIGKFLKKAKKGIGAVLKVLTTGL	2k98	Helical hairpin structure of potent antimicrobial peptide MSI-594 in the presence of Lipopolysaccharide micelle	SOLUTION NMR	micelles	LPS micelles
96	GRFKRFRKKFKKLFKKLSPVIPLLHL	2ket	solution structure of BMAP-27	SOLUTION NMR	mixture	Water:Ethanol mixture
97	KCNTATCATQRLANFLVRSSNNLGPVLPPTNVGSNTY	2kj7	Three-Dimensional NMR Structure of Rat Islet Amyloid Polypeptide in DPC micelles	SOLUTION NMR	micelles	DPC micelles
98	SGPNGQCGPGWGGCRGGLCCSQYGYCGSGPKYCAH	2kus	Spatial structure of Antimicrobial Peptide Sm-AMP-1.1a	SOLUTION NMR	water	Water
99	GTPCGESCVYIPCISGVIGCSCTDKVCYLN	2kux	Solution structure of the cyclotide kalata B5 from Oldenlandia affinis	SOLUTION NMR	water	Water
100	MTPFWRGVSLRPIGASCRDDSECITRLCRKRRCSLSVAQE	2l1q	Solution structure of human Liver Expressed Antimicrobial Peptide 2	SOLUTION NMR	water	Water
101	GSGRGSCRSQCMRRHEDEPWRVQECVSQCRRRRGGGD	2l2r	Helical hairpin structure of a novel antimicrobial peptide EcAMP1 from seeds of barnyard grass (Echinochloa crus-galli)	SOLUTION NMR	water	Water
102	GIGKALKKAKKGIGAVLKVLTTGL	2l36	Solution structure of MSI-594 derived mutant peptide MSI594F5A in Lipopolysaccharide Micelles	SOLUTION NMR	micelles	LPS micelles
103	GIRCPKSWKCKAFKQRVLKRLLAMLRQHAF	2l3i	Oxki4a, spider derived antimicrobial peptide	SOLUTION NMR	micelles	DPC micelles
104	GLKEIFKAGLGSLVKGIAAHVAS	2l5r	Conformational and membrane interactins studies of antimicrobial peptide Alyteserin-1C	SOLUTION NMR	water	Water
105	KKLKLAPAKLALLWKALALKLKKA	2l96	Solution structure of LAK160-P7	SOLUTION NMR	micelles	SDS micelles
106	KKLKLALAKPALLWKALALKLKKA	2l99	Solution structure of LAK160-P10	SOLUTION NMR	micelles	SDS micelles
107	KKLKLALAKLAPLWKALALKLKKA	2l9a	Solution structure of LAK160-P12	SOLUTION NMR	micelles	SDS micelles
108	RWKIFKKIEKVGRNVRDGIIKAGPAVAVVGQAATVVK	2la2	Solution structure of papiliocin isolated from the swallowtail butterfly, Papilio xuthus	SOLUTION NMR	water	Water
109	GLPTCGETCTLGTCYVPDCSCSWPICMKN	2lam	Three-dimensional structure of the cyclotide Cter M	SOLUTION NMR	mixture	Water:Acetonitrile mixture
110	AQRCGDQARGAKCPNCLCCGKYGFCGSGDAYCGAGSCQSQCRGC	2lb7	Hevein-type Antifungal Peptide with a Unique 10-Cysteine Motif	SOLUTION NMR	water	Water
111	AACSDRAHGHICESFKSFCKDSGRNGVKLRANCKKTCGLC	2lg4	3D solution structure of antimicrobial peptide aurelin	SOLUTION NMR	water	Water
112	LFCKGGSCHFGGCPSHLIKVGSCFGFRSCCKWPWNA	2lg5	NMR structure of Chicken AvBD2 defensin	SOLUTION NMR	water	Water
113	LFCKGGSCHFGGCPSHLIKVGSCFGFRSCCAWPWNA	2lg6	NMR structure of chicken AvBD2-K31A mutant	SOLUTION NMR	water	Water
114	KTCENLSDSFKGPCIPDGNCNKHCKEKEHLLSGRCRDDFRCWCTRNC	2lj7	3D solution structure of plant defensin Lc-def	SOLUTION NMR	water	Water
115	KYYGNGVHSTKSGSSVNWGEAFSAGVHRLANGGNGFW	2ljq	(C9S, C14S)-leucocin A	SOLUTION NMR	mixture	Water:TFE mixture
116	KYYGNGVHLTKSGLSVNWGEAFSAGVHRLANGGNGFW	2ljt	C9L,C14L-LeuA	SOLUTION NMR	mixture	Water:TFE mixture
117	ATCDLLSGTGVKHSACAAHCLLRGNRGGYCNGRAICVCRN	2lld	The Insect Defensin Lucifensin from Lucilia sericata	SOLUTION NMR	buffer	Sodium phosphate buffer
118	LLGDFFRKSKEKIGKEFKRIVQR	2lmf	Solution structure of human LL-23 bound to membrane-mimetic micelles	SOLUTION NMR	water	Water
119	VTCDVLSFEAKGIAVNHSACALHCIALRKKGGSCQNGVCVCRN	2ln4	Insight into the antimicrobial activities based on the Structure-activity relationships of coprisin isolated from the Dung Beetle, Copris tripartitus	SOLUTION NMR	water	Water
120	DAEFRHDSGYEVHHQKLVFFAENVGSNKGAIIGLMVGGVV	2lnq		SOLID-STATE NMR	N/A	N/A
121	RTCESQSHKFKGPCASDHNCASVCQTERFSGGRCRGFRRRCFCTTHC	2lr3	Solution structure of the anti-fungal defensin DEF4 (MTR_8g070770) from Medicago truncatula (barrel clover)	SOLUTION NMR	water	Water
122	GFGCPFNENECHAHCLSIGRKFGFCAGPLRATCTCGKQ	2lr5	1H chemical shift assignments for micasin	SOLUTION NMR	water	Water
123	RKCNFLCKLKEKLRTVITSHIDKVLRPQG	2lr7	Cathelicidin-PY	SOLUTION NMR	water	Water
124	GWGSFFKKAAHVGKHVGKAALTHYL	2ls9	Pleurocidin-NH2	SOLUTION NMR	micelles	SDS micelles
125	GIGKFLHSAKKFGKAFVGEIMNS	2lsa	Magainin	SOLUTION NMR	micelles	SDS micelles
126	GFGCPGDAYQCSEHCRALGGGRTGGYCAGPWYLGHPTCTCSF	2lt8	Eurocin solution structure	SOLUTION NMR	water	Water
127	GIINTLQKYYCRVRGAICHPVFCPRRYKQIGTCGLPGTKCCKKP	2lxo	Identification of the Structural Traits Mediating the Antimicrobial Activity of a Chimeric Peptide of HBD2 and HBD3	SOLUTION NMR	water	Water
128	ADDRCERMCQRYHDRREKKQCMKGCRYG	2m6a	NMR spatial structure of the antimicrobial peptide Tk-Amp-X2	SOLUTION NMR	water	Water
129	ADRGWIKTLTKDCPNVISSICAGTIITACKNCA	2m8v	Solution Structure and Activity Study of Bovicin HJ50, a Particular Type AII Lantibiotic	SOLUTION NMR	buffer	Sodium acetate buffer
130	GLPVCGETCTLGTCYTQGCTCSWPICKRN	2m9o	Solution structure of kalata B7	SOLUTION NMR	water	Water
131	GIGKFLHSAKKFGKAFVGEIMNS	2mag	NMR STRUCTURE OF MAGAININ 2 IN DPC MICELLES, 10 STRUCTURES	SOLUTION NMR	micelles	DPC micelles
132	GLPRKILCAIAKKKGKCKGPLKLVCKC	2mbd	Lasiocepsin	SOLUTION NMR	water	Water
133	TCHIRRKPKFRKFKLYHEGKFWCP	2mdl	Structure and NMR assignments of Scylla Serrata anti lipopolysaccharide Factor-24 (SsALF-24)	SOLUTION NMR	water	Water
134	CVLIGQRCDNDRGPRCCSGQGNCVPLPFLGGVCAV	2mfs	Solution NMR structure of the cactus-derived antimicrobial peptide Ep-AMP1	SOLUTION NMR	water	Water
135	GIGGVLLSAGKAALKGLAKVLAEKYAN	2mhw	The solution NMR structure of maximin-4 in SDS micelles	SOLUTION NMR	micelles	SDS micelles
136	GLGKAQCAALWLQCASGGTIGCGGGAVACQNYRQFCR	2mij	NMR structure of the S-linked glycopeptide sublancin 168	SOLUTION NMR	water	Water
137	GLFGVLAKVAGHVVGAIAEHF	2mmj	Structure of a peptoid analogue of maculatin G15 in DPC micelles	SOLUTION NMR	micelles	DPC micelles
138	GGLKKLGKKLEGAGKRVFKASEKALPVVVGIKAIGK	2mmm	Solution structure of the mature form, GK cecropin-like peptide from Ae. aegypti mosquito	SOLUTION NMR	mixture	Water:TFE mixture
139	GGAGHVPEYFVRGDFPISFYG	2mmt	Lasso peptide-based integrin inhibitor: Microcin J25 variant with RGDF substitution of Gly12-Ile13-Gly14-Thr15	SOLUTION NMR	methanol	Methanol
140	GGAGHVPEYFVRGDTPISFYG	2mmw	LASSO PEPTIDE BASED INTEGRIN INHIBITOR: MICROCIN J25 VARIANT WITH RGD SUBSTITUTION of GLY12-ILE13-GLY14	SOLUTION NMR	methanol	Methanol
141	GLPVCGETCVGGTCNTPGCTCSWWPVCTRN	2mn1	Solution Structure of kalata B1[W23WW]	SOLUTION NMR	mixture	Water:Acetonitrile mixture
142	DAEFRHDSGYEVHHQKLVFFADVGSNKGAIIGLMVGGVV	2mvx		SOLID-STATE NMR	N/A	N/A
143	KRFKKFFKKVKKSVKKRLKKIFKKPMVIGVTIPF	2mwt	NMR structure of crotalicidin in DPC micelles	SOLUTION NMR	micelles	DPC micelles
144	FEDLPNFGHIQVKVFNHGEHIHH	2n1c	Structure of PvHCt, an antimicrobial peptide from shrimp litopenaeus vannamei	SOLUTION NMR	water	Water
145	VKVKVKVKVPPTKVKVKVKV	2n1e		SOLID-STATE NMR	N/A	N/A
146	FEDLPNFGHIQVKVFNHGEHIHH	2n30	Structure of Ace-pvhct-NH2	SOLUTION NMR	methanol	Methanol
147	KYYGNGVSCNKKGCSVDWGKAIGIIGNNAAANLTTGGKAGWKG	2n4k	Solution Structure of Enterocin HF, an Antilisterial Bacteriocin Produced by Enterococcus faecium M3K31	SOLUTION NMR	mixture	Water:TFE mixture
148	SWLSKTAKKLENSAKKRISEGIAIAIQGGPR	2n92	Solution structure of cecropin P1 with LPS	SOLUTION NMR	micelles	LPS micelles
149	IKPEAPGEDASPEELNRYYASLRHYLNLVTRQRY	2na5	NMR solution structure of vitamin B12 conjugates of PYY3-36	SOLUTION NMR	water	Water
150	GLNALKKVFQGIHEAIKLINNHVQ	2ncx	Solution structure of pseudin-2 isolated from the skin of paradoxical frog, Pseudis paradoxa	SOLUTION NMR	micelles	DPC micelles
151	GLNALKKVFQPIHEAIKLINNHVQ	2ncy	Solution structure of pseudin-2 analog (Ps-P)	SOLUTION NMR	micelles	DPC micelles
152	DHYACVSSGGQCLYSACPIFTKIQGTCYRGKAKCCK	2nlb		X-RAY DIFFRACTION	N/A	N/A
153	DHYNCVSAGGQCLYSACPIFTKIQGTCYRGKAKCCK	2nlc		X-RAY DIFFRACTION	N/A	N/A
154	DHYNCVSSGGACLYSACPIFTKIQGTCYRGKAKCCK	2nld		X-RAY DIFFRACTION	N/A	N/A
155	DHYNCVSSGGQCAYSACPIFTKIQGTCYRGKAKCCK	2nle		X-RAY DIFFRACTION	N/A	N/A
156	DHYNCVSSGGQCEYSACPIFTKIQGTCYRGKAKCCK	2nlf		X-RAY DIFFRACTION	N/A	N/A
157	DHYNCVSSGGQCLYSACPIFTEIQGTCYRGKAKCCK	2nlg		X-RAY DIFFRACTION	N/A	N/A
158	DHYNCVSSGGQCLYSACPIFTKIAGTCYRGKAKCCK	2nlh		X-RAY DIFFRACTION	N/A	N/A
159	DHYNCVSSGGQCLYSACPIFTKIEGTCYRGKAKCCK	2nlp		X-RAY DIFFRACTION	N/A	N/A
160	DHYNCVSSGGQCLYSACPIFTKIQGTCYRGAAKCCK	2nlq		X-RAY DIFFRACTION	N/A	N/A
161	DHYNCVSSGGQCLYSACPIFTKIQGTCYRGEAKCCK	2nls		X-RAY DIFFRACTION	N/A	N/A
162	ATCDLASGFGVGSSLCAAHCIARRYRGGYCNSKAVCVCRN	2ny8	NMR structure of antibacterial defensin DEF-AAA from the insect anopheles gambiae	SOLUTION NMR	buffer	Sodium acetate buffer
163	ATCDLASIFNVNHALCAAHCIARRYRGGYCNSKAVCVCRN	2nz3	NMR structure of DEF-AcAA, a mutant of anopheles defensin DEF-AAA	SOLUTION NMR	buffer	Sodium acetate buffer
164	FFHHIFRPIVHVGKTIHRLVTG	2ojn	Solution structure and cell selectivity of Piscidin 1 and its analogues	SOLUTION NMR	micelles	SDS micelles
165	FFHHIFRAIVHVAKTIHRLVTG	2ojo	Solution structure and cell selectivity of Piscidin 1 and its analogues	SOLUTION NMR	micelles	SDS micelles
166	YPAKPEAPGEDASAEELSRYYASLRHYLNLVTRQRY	2oon	Structure of Ala14-PYY in aqueous solution	SOLUTION NMR	buffer	Sodium acetate buffer
167	YPAKPEYPGEDASPEELSRYYASLRHYLNLVTRQRY	2oop	Structure of Tyr7-PYY in solution	SOLUTION NMR	buffer	Sodium acetate buffer
168	SMWSGMWRRKLKKLRNALKKKLKGEK	2pco	Spatial Structure and Membrane Permeabilization for Latarcin-1, a Spider Antimicrobial Peptide	SOLUTION NMR	micelles	SDS micelles
169	DHYNCVSSGGQCLYSACPIFTRIQGTCYRGRARCCR	2plz		X-RAY DIFFRACTION	N/A	N/A
170	ACYCRIPACIAGEAAYGTCIYQGALWAFCC	2pm1		X-RAY DIFFRACTION	N/A	N/A
171	DCYCRIPACIAGEKKYGTCIYQGKLWAFCC	2pm4		X-RAY DIFFRACTION	N/A	N/A
172	DCYCRIPACIAGEAAYGTCIYQGALWAFCC	2pm5		X-RAY DIFFRACTION	N/A	N/A
173	CPKILKKCRRDSDCPGACICRGNGYCGSGSDGGV	2po8	The structure of a two-disulfide intermediate of MCoTI-II	SOLUTION NMR	water	Water
174	ELDKWASLWNWFNITNWLWYIK	2pv6	HIV-1 gp41 Membrane Proximal Ectodomain Region peptide in DPC micelle	SOLUTION NMR	micelles	DPC micelles
175	KSCCPNTTGRDIYNTCRLGGGSRERCASLSGCKIISASTCPSDYPK	2v9b		X-RAY DIFFRACTION	N/A	N/A
176	KSCCPSTTGRNIYNTCRLTGSSRETCAKLSGCKIISASTCPSNYPK	3c8p		X-RAY DIFFRACTION	N/A	N/A
177	CGETCTLGTCYTAGCSCSWPVCTRNGVPI	3e4h		X-RAY DIFFRACTION	N/A	N/A
178	ACYCRIPACIAGERRYGTCIYAGRLWAFCC	3h6c		X-RAY DIFFRACTION	N/A	N/A
179	CGGACYCRIPACIAGERRYGTCIYQGRLWAFCC	3hj2		X-RAY DIFFRACTION	N/A	N/A
180	ACYCRIPACIAGERRAGTCIYQGRLWAFCC	3lo1		X-RAY DIFFRACTION	N/A	N/A
181	ACYCRIPACIAGERRYGTCIAQGRLWAFCC	3lo2		X-RAY DIFFRACTION	N/A	N/A
182	ACYCRIPACIAGERRYGTCIYQGALWAFCC	3lo4		X-RAY DIFFRACTION	N/A	N/A
183	ACYCRIPACIAGERRYGTCIYQGRLWAACC	3loe		X-RAY DIFFRACTION	N/A	N/A
184	ACYCRAPACIAGERRYGTCIYQGRLWAFCC	3lvx		X-RAY DIFFRACTION	N/A	N/A
185	KDRPKKPGLCPPRPQKPCVKECKNDDSCPGQQKCCNYGCKDECRDPIFVG	3ngg		X-RAY DIFFRACTION	N/A	N/A
186	KTCENLADTFRGPCFTDGSCDDHCKNKEHLIKGRCRDDFRCWCTRNC	3psm		X-RAY DIFFRACTION	N/A	N/A
187	ACYCRIPACIAGERRYATCIYQGRLWAFCC	4du0		X-RAY DIFFRACTION	N/A	N/A
188	ACYCRIPACIAGERRAGTCIYQGRLWAACC	4lb1		X-RAY DIFFRACTION	N/A	N/A
189	ACYCRIPACIAGERRAGTCAYQGRAWAACC	4lb7		X-RAY DIFFRACTION	N/A	N/A
190	ACYCRIPACIAGERRYGTCAYQGRLWAFCC	4lbb		X-RAY DIFFRACTION	N/A	N/A
191	ACYCRIPACIAGERRYGTCAYQGRAWAFCC	4lbf		X-RAY DIFFRACTION	N/A	N/A
192	ACQCPDAISGWTHTDYQCHGLENKMYRHVYAICMNGTQVYCRTEWGSSC	4ozk		X-RAY DIFFRACTION	N/A	N/A
193	GLPVCAETCVGGTCNTPGCTCSWPVCTRNG	4ttn		X-RAY DIFFRACTION	N/A	N/A
194	GLPVCGETCVGGTCNTPGCTCSWPACTRNG	4tto		X-RAY DIFFRACTION	N/A	N/A
195	GIGKFLHAAKKFGKAFVAEIMNS	5cgo		X-RAY DIFFRACTION	N/A	N/A
196	LRVRRTLQCSCRRVCRNTCSCIRLSRSTYAS	5gwg	Solution structure of rattusin	SOLUTION NMR	water	Water
197	FIHHIIGGLFSAGKAIHRLIRRRRR	5h2s	Solution structure of Tilapia Piscidin 4 (TP4) from Oreochromis niloticus	SOLUTION NMR	micelles	DPC micelles
198	IFGAIWPLALGALKNLIK	5j6t	NMR structures of hylin-a1 analogs: Hylin-Ac	SOLUTION NMR	micelles	DPC micelles
199	DIFGAIWPLALGALKNLIK	5j6v	NMR structures of hylin-a1 analogs: Hylin-D	SOLUTION NMR	micelles	DPC micelles
200	KIFGAIWPLALGALKNLIK	5j6w	NMR structures of hylin-a1 analogs: Hylin-K	SOLUTION NMR	micelles	DPC micelles
201	MGIIAGIIKVIKSLIEQFTGK	5khb	Structure of Phenol-soluble modulin Alpha1	SOLUTION NMR	mixture	Water:TFE mixture
202	QPFIPRPIDTCRLRNGICFPGICRRPYYWIGTCNNGIGSCCARGWRS	5lcs	NMR structure of Chicken AvBD7 defensin	SOLUTION NMR	water	Water
203	ADDRCYRMCQRYHDRREKKQCKEGCRYG	5lm0	NMR spatial structure of Tk-hefu peptide	SOLUTION NMR	water	Water
204	RWCVYAYRRVRGVLVRYRRCW	5m9u	Spatial structure of antimicrobial peptide arenicin-1 mutant V8R	SOLUTION NMR	water	Water
205	RMCKTPSGKFKGYCVNNTNCKNVCRTEGFPTGSCDFHVAGRKCYCYKPCP	5nce	Structure of PsDef1 defensin from Pinus sylvestris	SOLUTION NMR	buffer	Sodium acetate buffer
206	WGWKEVVQNGQTIFSAGQKLGNMVGKIVPLPFG	5ujr	NMR Solution Structure of the Two-component Bacteriocin CbnXY	SOLUTION NMR	mixture	Water:TFE mixture
207	KYYGNGVTCGKHSCSVDWGKATTCIINNGALAWATGGHQGNHKC	5ukz	NMR Solution structure of chemically synthesized antilisterial Pediocin PA-1 M31L analog.	SOLUTION NMR	mixture	Water:TFE mixture
208	GFCWYVCVYRNGVRVCYRRCN	5v0y	Solution structure of arenicin-3.	SOLUTION NMR	water	Water
209	GFCWYVCARRNGARVCYRRCN	5v11	Solution structure of arenicin-3 synthetic analog.	SOLUTION NMR	water	Water
210	GGVCPKILQRCRRDSDCPGACICRGNGYCGSGSD	5wov	Solution NMR structure of cyclotide MCoTI-I	SOLUTION NMR	buffer	Sodium acetate buffer
211	GGVCPKILQRCRRDSDCPGACICRGNGYCGYPYDVPDYA	5wow	Solution NMR structure of cyclotide MCoTI-I	SOLUTION NMR	buffer	Sodium acetate buffer
212	GLGSVFGRLARILGRVIPKV	5x3l	Solution structure of a novel antimicrobial peptide, P1, from jumper ant Myrmecia pilosula	SOLUTION NMR	water	Water
213	GFGCPFNQGKCHRHCRSIRRRGGYCDGFLKQRCVCYRK	5xa6	Ion channel modulation by scorpion haemolymph and its defensin ingredients uncovers origin of neurotoxins in telson formed in Paleozoic scorpion	SOLUTION NMR	water	Water
214	GSKKPVPIIYCNAATGKCQRM	5xol	Thanatin R13R14AA in complex with LPS	SOLUTION NMR	water	Water
215	GFAWNVCVYRNGVRVCHRRAN	5y0h	Solution structure of arenicin-3 derivative N6	SOLUTION NMR	water	Water
216	GFCWNVCVYRNGVRVCHRRCN	5y0i	Solution structure of arenicin-3 derivative N1	SOLUTION NMR	water	Water
217	AFCWNVCVYRNAVRVCHRRCN	5y0j	Solution structure of arenicin-3 derivative N2	SOLUTION NMR	water	Water
218	NLCASLRARHTIPQCRKFGRR	5z1y	mBjAMP1 structure	SOLUTION NMR	buffer	Sodium phosphate buffer
219	AGECVRGRCPGGLCCSKFGFCGSGPAYCGG	5zv6	Solution structure of peptide cQ2 from Chenopodium quinoa	SOLUTION NMR	water	Water
220	ARECKTESNTFPGICITKPPCRKACISEKFTDGHCSKILRRCLCTKPC	6b55		X-RAY DIFFRACTION	N/A	N/A
221	GSACQFWSCNSSCISRGYRQGYCWGIQYKYCQCQ	6b9w	NMR solution structure of Defensin1 from Centruroides limpidus limpidus	SOLUTION NMR	water	Water
222	GSACQFWSCNSSCISRGYRQGKCWGIQYKYCQCQ	6bam	NMR solution structure of Defensin1 from Centruroides limpidus limpidus	SOLUTION NMR	water	Water
223	GMACQFWSCNSSCISRGYRQGKCWGIQYKYCQCY	6bb6	NMR solution structure of Defensin1 from Centruroides limpidus limpidus	SOLUTION NMR	water	Water
224	GMACQFWSCNSSCISRGYRQGKCWGKYCQCY	6bi5	NMR solution structure of Defensin1 from Centruroides limpidus limpidus	SOLUTION NMR	water	Water
225	VFQFLGKIIHHVGNFVHGFSHVF	6c41	The clavanin peptide in the presence of TFE (2,2,2-trifluoroethanol), presented a amphipathic alpha-helices from Phe-2 to Val-22 residues	SOLUTION NMR	mixture	Water:TFE mixture
226	IWLTALKFLGKNLGKLAKQQLAKL	6cl3	LyeTxI-b, a synthetic peptide derived from Lycosa erythrognatha spider venom, shows potent antibiotic activity, in vitro and in vivo	SOLUTION NMR	mixture	Water:TFE mixture
227	GLPICGETCLLGKCYTPGCSCRRPVCYKNG	6dhr	NMR Solution structure of Rivi3	SOLUTION NMR	water	Water
228	VCSCRLVFCRRTELRVGNCLIGAVSFTYCCTRV	6dmm		X-RAY DIFFRACTION	N/A	N/A
229	VCSCRLVFCRRTELRVGNCLIGGVSFAYCCTRV	6dmq		X-RAY DIFFRACTION	N/A	N/A
230	RTCQSQSHRFRGPCLRRSNCANVCRTEGFPGGRCRGFRRRCFCTTHC	6dmz	Solution structure of ZmD32	SOLUTION NMR	water	Water
231	GIGAVLKVLTTGLPALISWIKRKRQQ	6dst	Recombinant melittin	SOLUTION NMR	buffer	Potassium phosphate buffer
232	FLPIIINLKALAALAKKIL	6duu	Three-Dimensional Structures for mastoparano-MO	SOLUTION NMR	micelles	SDS micelles
233	ACDTATCVTHRLAGLLSRSGGVVKNNFVPTNVGSKAF	6e3y		ELECTRON MICROSCOPY	N/A	N/A
234	TKLTEEEKNRLNFLKKISQRYQKFALPQYLK	6fs4	NMR structure of Casocidin-II antimicrobial peptide in 60% TFE	SOLUTION NMR	mixture	Water:TFE mixture
235	GIGGKILSGLKTALKGAAKELASTYLH	6hz2	SOLUTION NMR STRUCTURE OF MAXIMIN 3 IN 50% TRIFLUOROETHANOL	SOLUTION NMR	mixture	Water:TFE mixture
236	GFGCNGPWNEDDLRCHNHCKSIKGYKGGYCAKGGFVCKCY	6k50	Solution structure of plectasin derivative NZ2114	SOLUTION NMR	mixture	Water:TFE mixture
237	GFGCNGPWQEDDLKCHNHCKSIKGYKGGYCAKGGFVCKCY	6k51	Solution structure of plectasin derivative MP1102	SOLUTION NMR	water	Water
238	RRTCRCRFGRCFRRESYSGSCNINGRIFSLCCR	6kra	Solution NMR Structure of RMAD4 alpha Defensin	SOLUTION NMR	water	Water
239	ACQCPDAISGWTHTDYQCHGLEKKMYRHVYAICMNGSQVYCRTEWGSSC	6lwy		X-RAY DIFFRACTION	N/A	N/A
240	ARQCKAESNTFTGICIAKPPCRQACIREKFTDGHCSKVLRRCLCTKRC	6mry		X-RAY DIFFRACTION	N/A	N/A
241	KTCENLSGTFKGPCIPDGNCNKHCRNNEHLLSGRCRDDFRCWCTNRC	6nom	NMR solution structure of Pisum sativum defensin 2 (Psd2) provides evidence for the presence of hydrophobic surface clusters	SOLUTION NMR	water	Water
242	AGKETIRQYLKNEIKKKGRKAVIAW	6o8j	Syn-safencin	SOLUTION NMR	water	Water
243	AGKEKIRKKLKNEIKKKGRKAVIAW	6o8p	Syn-safencin 8	SOLUTION NMR	water	Water
244	AWKEKIRKKLKNEIKKKGRKAVIAW	6o8r	Syn-safencin 24	SOLUTION NMR	water	Water
245	AGKEKIRKKLKNEIKKKWRKAVIAW	6o8s	Syn-safencin 56	SOLUTION NMR	water	Water
246	AWKEKIRKKLKNEIKKKWRKAVIAW	6o8t	Syn-safencin 96	SOLUTION NMR	water	Water
247	FETLRGDERILSILRHQNLLKELQD	6r2x	NMR structure of Chromogranin A (F39-D63)	SOLUTION NMR	buffer	Sodium phosphate buffer
248	GWGSFFRRAAHVGRHVGRAALTHYL	6rsf	NMR structure of pleurocidin KR in SDS micelles	SOLUTION NMR	micelles	SDS micelles
249	GWGSFFKKAAHAGKHAGKAALTHYL	6rsg	NMR structure of pleurocidin VA in SDS micelles	SOLUTION NMR	micelles	SDS micelles
250	GRRKRKWLRRIGKGVKIIGGAALDHL	6ry9	Winter flounder 1a-1 in SDS micelles	SOLUTION NMR	micelles	SDS micelles
251	WLRRIGKGVKIIGGAALDHL	6ryq	Winter flounder 1a in SDS micelles	SOLUTION NMR	micelles	SDS micelles
252	FLGALIKGAIHGGRFIHGMIQNHH	6rz1	Winter flounder 3 in SDS micelles	SOLUTION NMR	micelles	SDS micelles
253	GWGSIFKHGRHAAKHIGHAAVNHYL	6rzc	Winter flounder 4 in SDS micelles	SOLUTION NMR	micelles	SDS micelles
254	GKGRWLERIGKAGFIIIGGALDHL	6s2d	Winter flounder 1 in SDS micelles	SOLUTION NMR	micelles	SDS micelles
255	KTCENLADTYKGPCFTTGSCDDHCKNKEHLRSGRCRDDFRCWCTKNC	6vpn	Solution structure of antifungal plant defensin PvD1	SOLUTION NMR	water	Water
256	GIGDILKNLAKAAGKAALHAVGESL	6wpo	NMR Structure of HSP-4 antimicrobial peptide in presence of DPC-d38 micelles	SOLUTION NMR	micelles	DPC micelles
257	RTCESQSHKFKGPCLRASNCANVCKTEGFHGGKCRGFRRRCFCTKHC	7c2p		X-RAY DIFFRACTION	N/A	N/A
258	RVCESQSHKFEGACMGDHNCALVCRNEGFSGGKCKGLRRRCFCTKLC	7c31		X-RAY DIFFRACTION	N/A	N/A
259	GLPVCGETCVGGTCNTPGCVCSWPVCTRN	7k7x	Solution structure of the cyclotide pase A	SOLUTION NMR	water	Water
260	AIPCGESCVYIPCISVVIGCSCRNKVCYR	7kpd	NMR Solution Structure of Acyclotide ribe 31	SOLUTION NMR	water	Water
261	MITISTMLQFGLFLIALIGLVIKLIELSNKK	7ns1	S. aureus pepG1 NMR solution structure	SOLUTION NMR	mixture	Water:Isopropanol mixture
