# Supplementary material for: Benchmarking protein structure predictors to assist machine learning-guided peptide discovery
Source: Royal Society of Chemistry journal article supplement (doi:10.1039/d3dd00045a), 2023-01-01
Supplement: d3dd00045a3.csv [file d3dd00045a3.csv]

			PDBe			PEP2D									AF2+STRIDE
	peptide_sequence	pdb_id	pdbe_helix_H	pdbe_sheet_E	pdbe_coil_C	pep2d_helix_H	pep2d_sheet_E	pep2d_coil_C	jpred_helix_H	jpred_sheet_E	jpred_coil_C	psipred_helix_H	psipred_sheet_E	psipred_coil_C	AS_helix_H	AS_sheet_E	AS_coil_C
1	AVVKVPLKKFKSIRETMKEKGLLGEF	1avf	38.462	26.923	34.615	50	0.5	50	57.692	15.385	26.923	69.231	0	30.769	30.769	0	69.231
2	CGESCVWIPCISAALGCSCKNKVCYRNGIP	1bh4	36.667	0.5	63.333	13.33	16.67	70	23.333	13.333	63.333	26.667	20	53.333	10	33.333	56.667
3	LCNERPSQTWSGNCGNTAHCDKQCQDWEKASHGACHKRENHWKCFCYFNC	1bk8	22	36	42	18	36	46	14	26	60	28	20	52	24	38	38
4	APLSCGRNGGVCIPIRCPVPMRQIGTCFGRPVKCCRSW	1bnb	0.5	39.474	60.526	0.5	39.47	60.53	13.158	15.789	71.053	34.211	15.789	50	18.421	36.842	44.737
5	YSRCQLQGFNCVVRSYGLPTIPCCRGLTCRSYFPGSTYGRCQRY	1cix	0.5	25	75	0.5	25	75	0	15.909	84.091	0	36.364	63.636	0	38.636	61.364
6	VNYGNGVSCSKTKCSVNWGQAFQERYTAGINSFVSGVASGAGSIGRRP	1cw5	54.167	0.5	45.833	50	0.5	50	35.417	6.25	58.333	45.833	6.25	47.917	52.083	0	47.917
7	RSVCRQIKICRRRGGCYYKCTNRPY	1cz6	0.5	32	68	0.5	26.67	73.33	20	28	52	40	20	40	0	48	52
8	DCYCRIPACIAGERRYGTCIYQGRLWAFCC	1dfn	0.5	60	40	0.5	53.33	46.67	6.667	23.333	70	0	60	40	0	53.333	46.667
9	AGCIKNGGRCNASAGPPYCCSSYCFQIAGQSYGVCKNR	1dkc	0.5	34.211	65.789	0.5	34.21	65.79	0	13.158	86.842	7.895	15.789	76.316	0	26.316	73.684
10	GIGKYLHSAKKFGKAWVGEIMNS	1dum	60.87	0.5	39.13	36.67	3.33	60	82.609	0	17.391	91.304	0	8.696	91.304	0	8.696
11	PVTCLKSGAICHPVFCPRRYKQIGTCGLPGTKCCKKP	1e4q	0.5	27.027	72.973	0.5	35.14	64.86	0	16.216	83.784	24.324	24.324	51.351	18.919	37.838	43.243
12	YPSKPDNPGEDAPAEDLARYYSALRHYINLITRQRY	1f8p	58.333	0.5	41.667	52.78	0.5	47.22	47.222	0	52.778	52.778	0	47.222	52.778	0	47.222
13	GFGCPNNYQCHRHCKSIPGRCGGYCGGWHRLRCTCYRCG	1fjn	30.769	20.513	48.718	25.64	20.51	53.85	12.821	15.385	71.795	20.513	23.077	56.41	25.641	33.333	41.026
14	RGLRRLGRKIAHGVKKYGPTVLRIIRIAG	1fry	0.5	0.5	100	6.67	0.5	93.33	48.276	27.586	24.138	79.31	0	20.69	93.103	0	6.897
15	YPSKPDNPGEDAPAEDLARYYSALRHYINLAARQRY	1fvn	38.889	0.5	61.111	44.44	0.5	55.56	47.222	0	52.778	52.778	0	47.222	58.333	0	41.667
16	DKLIGSCVWGAVNYTSDCNGECKRRGYKGGHCGSFANVNCWCET	1i2u	20.455	27.273	52.273	15.91	36.36	47.73	29.545	0	70.455	11.364	25	63.636	18.182	36.364	45.455
17	DKLIGSCVWGAVNYTSDCNGECLLRGYKGGHCGSFANVNCWCET	1i2v	20.455	27.273	52.273	15.91	36.36	47.73	29.545	0	70.455	13.636	25	61.364	18.182	36.364	45.455
18	ATCDLLSGTGINHSACAAHCLLRGNRGGYCNGKGVCVCRN	1ica	30	10	60	25	17.5	57.5	22.5	10	67.5	25	10	65	32.5	27.5	40
19	YPSKPDNPGEDAPAEDLARYYSALRHYINLAPRQRY	1icy	41.667	0.5	58.333	33.33	0.5	66.67	44.444	0	55.556	52.778	0	47.222	47.222	0	52.778
20	ELPKLPDDKVLIRSRSNCPKGKVWNGFDCKSPFAFS	1iyc	13.889	16.667	69.444	8.33	16.67	75	0	11.111	88.889	0	16.667	83.333	16.667	16.667	66.667
21	KTCEHLADTYRGVCFTNASCDDHCKNKAHLISGTCHNWKCFCTQNC	1jkz	28.261	34.783	36.957	23.91	34.78	41.3	4.348	10.87	84.783	36.957	21.739	41.304	23.913	36.957	39.13
22	KSCCPNTTGRNIYNTCRFGGGSRQVCASLSGCKIISASTCPSDYPK	1jmn	52.174	8.696	39.13	39.13	8.7	52.17	13.043	17.391	69.565	34.783	6.522	58.696	45.652	8.696	45.652
23	KSCCPNTTGRNIYNTCRLGGGSRERCASLSGCKIISASTCPSDYPK	1jmp	50	0.5	50	43.48	8.7	47.83	13.043	17.391	69.565	34.783	6.522	58.696	45.652	8.696	45.652
24	GIINTLQKYYCRVRGGRCAVLSCLPKEEQIGKCSTRGRKCCRRKK	1kj6	15.556	28.889	55.556	11.11	28.89	60	24.444	11.111	64.444	64.444	15.556	20	28.889	31.111	40
25	AKIPIKAIKTVGKAVGKGLRAINIASTANDVFNFLKPKKRKA	1kv4	76.19	0.5	23.81	71.43	0.5	28.57	66.667	0	33.333	57.143	7.143	35.714	73.81	0	26.19
26	ATCDLLSGTGINHSACAAHCLLRGNRGGYCNGKAVCVCRN	1l4v	32.5	25	42.5	25	25	50	22.5	10	67.5	25	10	65	32.5	25	42.5
27	FKCRRWQWRMKKLGAPSITCVRRAF	1lfc	0.5	24	76	0.5	26.67	73.33	32	24	44	72	0	28	48	0	52
28	GCLEFWWKCNPNDDKCCRPKLKCSKLFKLCNFSF	1lu8	0.5	23.529	76.471	0.5	29.41	70.59	14.706	11.765	73.529	23.529	17.647	58.824	0	35.294	64.706
29	SSMKLSFRARAYGFRGPGPQL	1lv4	0.5	0.5	100	0.5	0.5	100	0	19.048	80.952	0	47.619	52.381	71.429	0	28.571
30	GLRKRLRKFRNKIKEKLKKIGQKIQGLLPKLA	1lyp	100	0.5	0.5	93.75	0.5	6.25	81.25	0	18.75	93.75	0	6.25	93.75	0	6.25
31	ICIFCCGCCHRSKCGMCCKT	1m4e	0.5	40	60	0.5	30	70	0	35	65	0	35	65	0	50	50
32	ACNFQSCWATCQAQHSIYFRRAFCDRSQCKCVFVRG	1mm0	36.111	36.111	27.778	30.56	36.11	33.33	44.444	16.667	38.889	55.556	19.444	25	41.667	36.111	22.222
33	VGECVRGRCPSGMCCSQFGYCGKGPKYCGR	1mmc	20	13.333	66.667	13.33	20	66.67	0	6.667	93.333	16.667	0	83.333	16.667	30	53.333
34	DCLSGRYKGPCAVWDNETCRRVCKEEGRSSGHCSPSLKCWCEGC	1myn	29.545	27.273	43.182	25	22.73	52.27	18.182	18.182	63.636	20.455	20.455	59.091	27.273	27.273	45.455
35	KYYGNGVHCGKHSCTVDWGTAIGCIGNNAAANWATGGNAGWNKC	1ohm	36.364	0.5	63.636	31.82	6.82	61.36	34.091	13.636	52.273	11.364	34.091	54.545	40.909	15.909	43.182
36	VCGETCVGGTCNTPGCTCSWPVCT	1orx	0.5	0.5	100	0.5	23.33	76.67	0	33.333	66.667	0	29.167	70.833	0	25	75
37	DKLIGSCVWGAVNYTSNCNAECKRRGYKGGHCGSFANVNCWCET	1ozz	31.818	34.091	34.091	15.91	36.36	47.73	29.545	0	70.455	11.364	25	63.636	18.182	36.364	45.455
38	DKLIGSCVWGAVNYTSNCRAECKRRGYKGGHCGSFANVNCWCET	1p00	20.455	34.091	45.455	15.91	36.36	47.73	27.273	0	72.727	11.364	25	63.636	18.182	36.364	45.455
39	DKLIGSCVWGAVNYTSNCNAECKRRGYKGGHCGSFLNVNCWCET	1p0a	22.727	27.273	50	15.91	34.09	50	25	2.273	72.727	11.364	43.182	45.455	18.182	36.364	45.455
40	AKKVFKRLEKLFSKIQNDK	1p0g	68.421	0.5	31.579	40	0.5	60	78.947	0	21.053	78.947	0	21.053	94.737	0	5.263
41	AKKVFKRLEKLFSKIWNDK	1p0l	84.211	0.5	15.789	40	0.5	60	78.947	0	21.053	78.947	0	21.053	94.737	0	5.263
42	AKKVFKRLEKLFSKIWNWK	1p0o	84.211	0.5	15.789	40	0.5	60	78.947	0	21.053	78.947	0	21.053	94.737	0	5.263
43	AKKVFKRLEKSFSKIQNDK	1p5k	78.947	0.5	21.053	40	0.5	60	78.947	0	21.053	78.947	0	21.053	94.737	0	5.263
44	AKKVSKRLEKLFSKIQNDK	1p5l	73.684	0.5	26.316	40	0.5	60	73.684	0	26.316	73.684	0	26.316	94.737	0	5.263
45	NKGCATCSIGAACLVDGPIPDFEIAGATGLFGLWG	1pxq	22.857	0.5	77.143	11.43	0.5	88.57	25.714	22.857	51.429	0	31.429	68.571	77.143	0	22.857
46	CIKNGNGCQPNGSQGNCCSGYCHKQPGWVAGYCRRK	1q3j	0.5	22.222	77.778	0.5	22.22	77.78	0	11.111	88.889	0	25	75	0	33.333	66.667
47	YPSKPDNPGEDAPAEDMARYYSALRHYINLITRQRY	1ron	72.222	0.5	27.778	61.11	0.5	38.89	47.222	0	52.778	52.778	0	47.222	52.778	0	47.222
48	GCRFCCNCCPNMSGCGVCCRF	1s6w	0.5	28.571	71.429	0.5	26.67	73.33	0	38.095	61.905	0	38.095	61.905	0	38.095	61.905
49	RTCMIKKEGWGKCLIDTTCAHSCKNRGYIGGNCKGMTRTCYCLVNC	1ti5	36.957	32.609	30.435	30.43	32.61	36.96	10.87	30.435	58.696	15.217	39.13	45.652	23.913	39.13	36.957
50	GCLEFWWKCNPNDDKCCRPKLKCSKLFKLCNFSF	1tyk	0.5	17.647	82.353	0.5	29.41	70.59	14.706	11.765	73.529	23.529	17.647	58.824	0	35.294	64.706
51	YPSKPDNPGEDAPAEDLAQYAADLRHYINLITRQRY	1tz4	50	0.5	50	52.78	0.5	47.22	47.222	0	52.778	52.778	0	47.222	52.778	0	47.222
52	EIAALEKEIAALEKEIAALEK	1u0i	100	0.5	0.5	63.33	0.5	36.67	85.714	0	14.286	95.238	0	4.762	95.238	0	4.762
53	SFGLCRLRRGFCARGRCRFPSIPIGRCSRFVQCCRRVW	1ut3	0.5	36.842	63.158	0.5	36.84	63.16	42.105	0	57.895	60.526	0	39.474	18.421	47.368	34.211
54	CAESCVWIPCTVTALLGCSCSNKVCYNGIP	1vb8	16.667	0.5	83.333	10	16.67	73.33	13.333	26.667	60	20	23.333	56.667	10	33.333	56.667
55	ASIVKTTIKAAKKLCRGFTLTCGCHFTGKK	1w9n	0.5	0.5	100	23.33	23.33	53.33	43.333	10	46.667	40	26.667	33.333	86.667	0	13.333
56	GKIPVKAIKKAGAAIGKGLRAINIASTAHDVYSFFKPKHKKK	1x22	78.571	0.5	21.429	73.81	0.5	26.19	66.667	0	33.333	61.905	7.143	30.952	73.81	0	26.19
57	HSSGYTRPLRKPSRPIFIRPIGCDVCYGIPSSTARLCCFRYGDCCHL	1xv3	23.404	0.5	76.596	19.15	0.5	80.85	0	21.277	78.723	0	36.17	63.83	23.404	0	76.596
58	KSSAYSLQMGATAIKQVKKLFKKWGW	1ytr	46.154	0.5	53.846	33.33	0.5	66.67	57.692	0	42.308	76.923	0	23.077	88.462	0	11.538
59	GWGSFFKKAAHVGKHVGKAALTHYL	1z64	80	0.5	20	76.67	0.5	23.33	80	0	20	96	0	4	92	0	8
60	VCSCRLVFCRRTELRVGNCLIGGVSFTYCCTRV	1zmm	0.5	57.576	42.424	0.5	57.58	42.42	18.182	24.242	57.576	0	75.758	24.242	0	60.606	39.394
61	VGECVRGRCPSGMCCSQFGFCGKGPKYCGR	1znt	20	13.333	66.667	13.33	20	66.67	3.333	0	96.667	16.667	0	83.333	16.667	30	53.333
62	RGFRKHFNKLVKKVKHTISETAHVAKDTAVIAGSGAAVVAAT	1zrx	92.857	0.5	7.143	76.19	0.5	23.81	52.381	19.048	28.571	57.143	21.429	21.429	95.238	0	4.762
63	VGECVRGRCPSGMCCSQWGYCGKGPKYCGR	1zuv	0.5	13.333	86.667	13.33	20	66.67	0	6.667	93.333	16.667	0	83.333	16.667	30	53.333
64	VGECVRGRCPSGMCCSQAGYCGKGPKYCGR	1zwu	20	23.333	56.667	13.33	20	66.67	6.667	0	93.333	16.667	6.667	76.667	16.667	30	53.333
65	ARSYGNGVYCNNKKCWVNRGEATQSIIGGMISGWASGLAGM	2a2b	51.22	0.5	48.78	41.46	2.44	56.1	36.585	21.951	41.463	12.195	41.463	46.341	53.659	24.39	21.951
66	RVKRVWPLVIRTVIAGYNLYRAIKKK	2amn	65.385	0.5	34.615	46.67	0.5	53.33	76.923	0	23.077	88.462	0	11.538	84.615	0	15.385
67	RRWCFRVCYRGRFCYRKCR	2b5k	0.5	21.053	78.947	0.5	20	80	0	63.158	36.842	0	68.421	31.579	0	63.158	36.842
68	GFGCPGNQLKCNNHCKSISCRAGYCDAATLWLRCTCTDCNGKK	2b68	27.907	13.953	58.14	23.26	13.95	62.79	16.279	20.93	62.791	0	41.86	58.14	32.558	32.558	34.884
69	YVSCLFRGARCRVYSGRSCCFGYYCRRDFPGSIFGTCSRRNF	2dcv	0.5	33.333	66.667	0.5	38.1	61.9	0	38.095	61.905	0	57.143	42.857	0	40.476	59.524
70	YITCLFRGARCRVYSGRSCCFGYYCRRDFPGSIFGTCSRRNF	2dcw	0.5	33.333	66.667	0.5	38.1	61.9	0	40.476	59.524	0	57.143	42.857	0	40.476	59.524
71	YPIKPEAPGEDASPEELNRYYASLRHYLNLVTRQRY	2dez	58.333	0.5	41.667	38.89	0.5	61.11	44.444	0	55.556	52.778	0	47.222	52.778	0	47.222
72	IKPEAPGEDASPEELNRYYASLRHYLNLVTRQRY	2df0	47.059	0.5	52.941	41.18	0.5	58.82	50	0	50	55.882	0	44.118	55.882	0	44.118
73	ATCDLASKWNWNHTLCAAHCIARRYRGGYCNSKAVCVCRN	2e3g	35	20	45	25	20	55	22.5	10	67.5	25	10	65	32.5	25	42.5
74	CGESCVFIPCISTLLGCSCKNKVCYRNGVIP	2eri	0.5	25.806	74.194	0.5	32.26	67.74	16.129	22.581	61.29	25.806	19.355	54.839	9.677	32.258	58.065
75	IGKEFKRIVQRIKDFLRNLVPRTES	2fcg	64	0.5	36	50	0.5	50	64	0	36	68	0	32	76	0	24
76	SAISCGETCFKFKCYTPRCSCSYPVCK	2fqa	0.5	33.333	66.667	0.5	33.33	66.67	0	22.222	77.778	0	33.333	66.667	0	22.222	77.778
77	GILDTLKQFAKGVGKDLVKGAAQGVLSTVSCKLAKTC	2g9l	32.432	0.5	67.568	59.46	0.5	40.54	83.784	0	16.216	89.189	0	10.811	89.189	0	10.811
78	GLFGKLIKKFGRKAISYAVKKARGKH	2g9p	84.615	0.5	15.385	60	0.5	40	76.923	0	23.077	84.615	0	15.385	88.462	0	11.538
79	LVQRGRFGRFLRKIRRFRPKVTITIQGSARF	2gdl	54.839	0.5	45.161	41.94	0.5	58.06	38.71	22.581	38.71	35.484	25.806	38.71	74.194	0	25.806
80	KTCENLANTYRGPCFTTGSCDDHCKNKEHLRSGRCRDDFRCWCTRNC	2gl1	25.532	31.915	42.553	21.28	31.91	46.81	6.383	8.511	85.106	38.298	12.766	48.936	25.532	31.915	42.553
81	KRFWPLVPVAINTVAAGINLYKAIRRK	2hfr	40.741	0.5	59.259	40	0.5	60	66.667	3.704	29.63	77.778	0	22.222	81.481	0	18.519
82	SGSLSTFFRLFNRSFTQALGK	2i2j	80.952	0.5	19.048	46.67	0.5	53.33	76.19	0	23.81	85.714	0	14.286	95.238	0	4.762
83	KWKVFKKIEKKWKVFKKIEKAGPKWKVFKKIEK	2igr	96.97	0.5	3.03	81.82	0.5	18.18	63.636	0	36.364	78.788	0	21.212	93.939	0	6.061
84	GVCPKILKKCRRDSDCPGACICRGNGYCG	2it8	17.241	13.793	68.966	10	20	70	27.586	13.793	58.621	27.586	13.793	58.621	10.345	20.69	68.966
85	FLSLIPHAINAVSTLVHHF	2jpy	84.211	0.5	15.789	43.33	0.5	56.67	73.684	0	26.316	94.737	0	5.263	84.211	0	15.789
86	FLSLIPHAINAVSAIAKHN	2jq0	84.211	0.5	15.789	46.67	0.5	53.33	68.421	0	31.579	84.211	0	15.789	84.211	0	15.789
87	FLSLIPHAINAVSALANHG	2jq1	68.421	0.5	31.579	43.33	0.5	56.67	63.158	0	36.842	78.947	0	21.053	84.211	0	15.789
88	GKIPVKAIKQAGKVIGKGLRAINIAGTTHDVVSFFRPKKKKH	2jr8	78.571	0.5	21.429	73.81	0.5	26.19	64.286	0	35.714	59.524	7.143	33.333	73.81	0	26.19
89	RWCVYAYVRVRGVLVRYRRCW	2jsb	0.5	85.714	14.286	0.5	50	50	0	80.952	19.048	0	95.238	4.762	0	76.19	23.81
90	CGETCTLGTCYTQGCTCSWPICKRNGLPV	2jwm	0.5	20.69	79.31	0.5	23.33	76.67	0	10.345	89.655	0	44.828	55.172	0	34.483	65.517
91	GILSSFKGVAKGVAKDLAGKLLETLKCKITGC	2k10	87.5	0.5	12.5	78.12	0.5	21.88	71.875	0	28.125	84.375	0	15.625	90.625	0	9.375
92	RRTCHCRSRCLRRESNSGSCNINGRIFSLCCR	2k1i	0.5	59.375	40.625	0.5	59.38	40.62	0	34.375	65.625	28.125	31.25	40.625	0	59.375	40.625
93	GFGALFKFLAKKVAKTVAKQAAKQGAKYVVNKQME	2k38	34.286	0.5	65.714	31.43	0.5	68.57	85.714	0	14.286	88.571	0	11.429	94.286	0	5.714
94	GVPICGETCTLGTCYTAGCSCSWPVCTRN	2k7g	10.345	31.034	58.621	0.5	50	50	0	27.586	72.414	0	31.034	68.966	0	37.931	62.069
95	GIGKFLKKAKKGIGAVLKVLTTGL	2k98	91.667	0.5	8.333	53.33	0.5	46.67	70.833	0	29.167	91.667	0	8.333	87.5	0	12.5
96	GRFKRFRKKFKKLFKKLSPVIPLLHL	2ket	88.462	0.5	11.538	63.33	0.5	36.67	73.077	0	26.923	92.308	0	7.692	61.538	0	38.462
97	KCNTATCATQRLANFLVRSSNNLGPVLPPTNVGSNTY	2kj7	56.757	0.5	43.243	40.54	0.5	59.46	37.838	0	62.162	37.838	5.405	56.757	54.054	0	45.946
98	SGPNGQCGPGWGGCRGGLCCSQYGYCGSGPKYCAH	2kus	17.143	11.429	71.429	11.43	22.86	65.71	0	0	100	8.571	0	91.429	8.571	25.714	65.714
99	GTPCGESCVYIPCISGVIGCSCTDKVCYLN	2kux	20	43.333	36.667	13.33	43.33	43.33	13.333	26.667	60	0	43.333	56.667	10	46.667	43.333
100	MTPFWRGVSLRPIGASCRDDSECITRLCRKRRCSLSVAQE	2l1q	10	10	80	7.5	17.5	75	22.5	0	77.5	45	0	55	7.5	20	72.5
101	GSGRGSCRSQCMRRHEDEPWRVQECVSQCRRRRGGGD	2l2r	64.865	0.5	35.135	54.05	0.5	45.95	56.757	0	43.243	67.568	0	32.432	75.676	0	24.324
102	GIGKALKKAKKGIGAVLKVLTTGL	2l36	91.667	0.5	8.333	56.67	0.5	43.33	70.833	0	29.167	91.667	0	8.333	87.5	0	12.5
103	GIRCPKSWKCKAFKQRVLKRLLAMLRQHAF	2l3i	56.667	0.5	43.333	46.67	16.67	36.67	56.667	0	43.333	66.667	0	33.333	80	0	20
104	GLKEIFKAGLGSLVKGIAAHVAS	2l5r	95.652	0.5	4.348	70	0.5	30	82.609	0	17.391	91.304	0	8.696	91.304	0	8.696
105	KKLKLAPAKLALLWKALALKLKKA	2l96	45.833	0.5	54.167	53.33	0.5	46.67	70.833	0	29.167	70.833	8.333	20.833	70.833	0	29.167
106	KKLKLALAKPALLWKALALKLKKA	2l99	83.333	0.5	16.667	56.67	0.5	43.33	75	0	25	58.333	16.667	25	87.5	0	12.5
107	KKLKLALAKLAPLWKALALKLKKA	2l9a	45.833	0.5	54.167	56.67	0.5	43.33	87.5	0	12.5	87.5	0	12.5	91.667	0	8.333
108	RWKIFKKIEKVGRNVRDGIIKAGPAVAVVGQAATVVK	2la2	91.892	0.5	8.108	40.54	13.51	45.95	75.676	0	24.324	83.784	0	16.216	97.297	0	2.703
109	GLPTCGETCTLGTCYVPDCSCSWPICMKN	2lam	0.5	20.69	79.31	0.5	30	70	0	31.034	68.966	0	27.586	72.414	0	44.828	55.172
110	AQRCGDQARGAKCPNCLCCGKYGFCGSGDAYCGAGSCQSQCRGC	2lb7	25	25	50	15.91	29.55	54.55	0	0	100	6.818	0	93.182	0	22.727	77.273
111	AACSDRAHGHICESFKSFCKDSGRNGVKLRANCKKTCGLC	2lg4	47.5	0.5	52.5	5	15	80	25	12.5	62.5	52.5	12.5	35	52.5	5	42.5
112	LFCKGGSCHFGGCPSHLIKVGSCFGFRSCCKWPWNA	2lg5	0.5	30.556	69.444	2.78	33.33	63.89	0	22.222	77.778	38.889	0	61.111	0	38.889	61.111
113	LFCKGGSCHFGGCPSHLIKVGSCFGFRSCCAWPWNA	2lg6	13.889	47.222	38.889	2.78	33.33	63.89	0	27.778	72.222	30.556	0	69.444	0	44.444	55.556
114	KTCENLSDSFKGPCIPDGNCNKHCKEKEHLLSGRCRDDFRCWCTRNC	2lj7	19.149	31.915	48.936	14.89	40.43	44.68	10.638	19.149	70.213	42.553	12.766	44.681	21.277	36.17	42.553
115	KYYGNGVHSTKSGSSVNWGEAFSAGVHRLANGGNGFW	2ljq	64.865	0.5	35.135	56.76	2.7	40.54	27.027	8.108	64.865	32.432	8.108	59.459	43.243	0	56.757
116	KYYGNGVHLTKSGLSVNWGEAFSAGVHRLANGGNGFW	2ljt	70.27	0.5	29.73	64.86	2.7	32.43	27.027	13.514	59.459	32.432	16.216	51.351	43.243	0	56.757
117	ATCDLLSGTGVKHSACAAHCLLRGNRGGYCNGRAICVCRN	2lld	22.5	15	62.5	25	25	50	22.5	10	67.5	25	10	65	32.5	25	42.5
118	LLGDFFRKSKEKIGKEFKRIVQR	2lmf	91.304	0.5	8.696	66.67	0.5	33.33	82.609	0	17.391	95.652	0	4.348	95.652	0	4.348
119	VTCDVLSFEAKGIAVNHSACALHCIALRKKGGSCQNGVCVCRN	2ln4	27.907	23.256	48.837	37.21	23.26	39.53	20.93	6.977	72.093	23.256	25.581	51.163	46.512	23.256	30.233
120	DAEFRHDSGYEVHHQKLVFFAENVGSNKGAIIGLMVGGVV	2lnq	0.5	35	65	27.5	17.5	55	12.5	27.5	60	5	45	50	0	30	70
121	RTCESQSHKFKGPCASDHNCASVCQTERFSGGRCRGFRRRCFCTTHC	2lr3	27.66	31.915	40.426	10.64	29.79	59.57	8.511	25.532	65.957	14.894	36.17	48.936	23.404	36.17	40.426
122	GFGCPFNENECHAHCLSIGRKFGFCAGPLRATCTCGKQ	2lr5	31.579	21.053	47.368	21.05	26.32	52.63	47.368	0	52.632	47.368	7.895	44.737	28.947	26.316	44.737
123	RKCNFLCKLKEKLRTVITSHIDKVLRPQG	2lr7	0.5	0.5	100	60	10	30	65.517	0	34.483	75.862	0	24.138	72.414	0	27.586
124	GWGSFFKKAAHVGKHVGKAALTHYL	2ls9	72	0.5	28	76.67	0.5	23.33	80	0	20	96	0	4	92	0	8
125	GIGKFLHSAKKFGKAFVGEIMNS	2lsa	91.304	0.5	8.696	56.67	0.5	43.33	86.957	0	13.043	91.304	0	8.696	91.304	0	8.696
126	GFGCPGDAYQCSEHCRALGGGRTGGYCAGPWYLGHPTCTCSF	2lt8	30.952	23.81	45.238	11.9	26.19	61.9	14.286	0	85.714	26.19	9.524	64.286	33.333	23.81	42.857
127	GIINTLQKYYCRVRGAICHPVFCPRRYKQIGTCGLPGTKCCKKP	2lxo	0.5	0.5	100	4.55	31.82	63.64	25	27.273	47.727	47.727	13.636	38.636	29.545	31.818	38.636
128	ADDRCERMCQRYHDRREKKQCMKGCRYG	2m6a	78.571	0.5	21.429	16.67	23.33	60	67.857	0	32.143	85.714	0	14.286	82.143	0	17.857
129	ADRGWIKTLTKDCPNVISSICAGTIITACKNCA	2m8v	0.5	0.5	100	6.06	24.24	69.7	72.727	0	27.273	84.848	0	15.152	0	24.242	75.758
130	GLPVCGETCTLGTCYTQGCTCSWPICKRN	2m9o	0.5	27.586	72.414	0.5	30	70	0	31.034	68.966	0	31.034	68.966	0	44.828	55.172
131	GIGKFLHSAKKFGKAFVGEIMNS	2mag	86.957	0.5	13.043	56.67	0.5	43.33	86.957	0	13.043	91.304	0	8.696	91.304	0	8.696
132	GLPRKILCAIAKKKGKCKGPLKLVCKC	2mbd	74.074	0.5	25.926	23.33	26.67	50	33.333	22.222	44.444	33.333	22.222	44.444	62.963	0	37.037
133	TCHIRRKPKFRKFKLYHEGKFWCP	2mdl	0.5	0.5	100	23.33	10	66.67	0	62.5	37.5	0	37.5	62.5	0	75	25
134	CVLIGQRCDNDRGPRCCSGQGNCVPLPFLGGVCAV	2mfs	0.5	28.571	71.429	0.5	37.14	62.86	0	11.429	88.571	8.571	31.429	60	0	37.143	62.857
135	GIGGVLLSAGKAALKGLAKVLAEKYAN	2mhw	70.37	0.5	29.63	63.33	6.67	30	81.481	0	18.519	85.185	0	14.815	92.593	0	7.407
136	GLGKAQCAALWLQCASGGTIGCGGGAVACQNYRQFCR	2mij	54.054	0.5	45.946	21.62	24.32	54.05	18.919	21.622	59.459	37.838	18.919	43.243	70.27	0	29.73
137	GLFGVLAKVAGHVVGAIAEHF	2mmj	90.476	0.5	9.524	56.67	0.5	43.33	85.714	0	14.286	95.238	0	4.762	90.476	0	9.524
138	GGLKKLGKKLEGAGKRVFKASEKALPVVVGIKAIGK	2mmm	94.444	0.5	5.556	44.44	5.56	50	77.778	0	22.222	83.333	0	16.667	94.444	0	5.556
139	GGAGHVPEYFVRGDFPISFYG	2mmt	0.5	0.5	100	0.5	16.67	83.33	0	38.095	61.905	0	42.857	57.143	14.286	0	85.714
140	GGAGHVPEYFVRGDTPISFYG	2mmw	0.5	0.5	100	0.5	16.67	83.33	0	47.619	52.381	0	42.857	57.143	14.286	0	85.714
141	GLPVCGETCVGGTCNTPGCTCSWWPVCTRN	2mn1	0.5	23.333	76.667	0.5	26.67	73.33	0	3.333	96.667	0	13.333	86.667	0	36.667	63.333
142	DAEFRHDSGYEVHHQKLVFFADVGSNKGAIIGLMVGGVV	2mvx	0.5	41.026	58.974	25.64	15.38	58.97	0	41.026	58.974	0	48.718	51.282	0	0	100
143	KRFKKFFKKVKKSVKKRLKKIFKKPMVIGVTIPF	2mwt	61.765	0.5	38.235	52.94	5.88	41.18	61.765	14.706	23.529	64.706	17.647	17.647	82.353	0	17.647
144	FEDLPNFGHIQVKVFNHGEHIHH	2n1c	65.217	0.5	34.783	6.67	13.33	80	0	43.478	56.522	0	43.478	56.522	60.87	0	39.13
145	VKVKVKVKVPPTKVKVKVKV	2n1e	0.5	80	20	13.33	20	66.67	0	65	35	0	75	25	0	80	20
146	FEDLPNFGHIQVKVFNHGEHIHH	2n30	69.565	0.5	30.435	6.67	13.33	80	0	43.478	56.522	0	43.478	56.522	60.87	0	39.13
147	KYYGNGVSCNKKGCSVDWGKAIGIIGNNAAANLTTGGKAGWKG	2n4k	37.209	0.5	62.791	37.21	11.63	51.16	34.884	11.628	53.488	13.953	32.558	53.488	41.86	20.93	37.209
148	SWLSKTAKKLENSAKKRISEGIAIAIQGGPR	2n92	51.613	0.5	48.387	61.29	0.5	38.71	61.29	9.677	29.032	61.29	16.129	22.581	83.871	0	16.129
149	IKPEAPGEDASPEELNRYYASLRHYLNLVTRQRY	2na5	61.765	0.5	38.235	41.18	0.5	58.82	50	0	50	55.882	0	44.118	55.882	0	44.118
150	GLNALKKVFQGIHEAIKLINNHVQ	2ncx	91.667	0.5	8.333	56.67	0.5	43.33	83.333	0	16.667	91.667	0	8.333	95.833	0	4.167
151	GLNALKKVFQPIHEAIKLINNHVQ	2ncy	87.5	0.5	12.5	50	3.33	46.67	83.333	0	16.667	91.667	0	8.333	95.833	0	4.167
152	DHYACVSSGGQCLYSACPIFTKIQGTCYRGKAKCCK	2nlb	22.222	33.333	44.444	16.67	33.33	50	0	41.667	58.333	5.556	52.778	41.667	30.556	33.333	36.111
153	DHYNCVSAGGQCLYSACPIFTKIQGTCYRGKAKCCK	2nlc	22.222	33.333	44.444	16.67	33.33	50	0	41.667	58.333	5.556	47.222	47.222	30.556	33.333	36.111
154	DHYNCVSSGGACLYSACPIFTKIQGTCYRGKAKCCK	2nld	22.222	33.333	44.444	16.67	33.33	50	0	33.333	66.667	0	44.444	55.556	30.556	33.333	36.111
155	DHYNCVSSGGQCAYSACPIFTKIQGTCYRGKAKCCK	2nle	22.222	33.333	44.444	16.67	33.33	50	0	41.667	58.333	0	50	50	30.556	33.333	36.111
156	DHYNCVSSGGQCEYSACPIFTKIQGTCYRGKAKCCK	2nlf	22.222	33.333	44.444	16.67	33.33	50	0	41.667	58.333	0	47.222	52.778	30.556	33.333	36.111
157	DHYNCVSSGGQCLYSACPIFTEIQGTCYRGKAKCCK	2nlg	22.222	33.333	44.444	16.67	33.33	50	0	36.111	63.889	5.556	36.111	58.333	30.556	33.333	36.111
158	DHYNCVSSGGQCLYSACPIFTKIAGTCYRGKAKCCK	2nlh	22.222	33.333	44.444	16.67	33.33	50	0	41.667	58.333	27.778	11.111	61.111	30.556	33.333	36.111
159	DHYNCVSSGGQCLYSACPIFTKIEGTCYRGKAKCCK	2nlp	22.222	33.333	44.444	16.67	33.33	50	0	36.111	63.889	5.556	38.889	55.556	30.556	33.333	36.111
160	DHYNCVSSGGQCLYSACPIFTKIQGTCYRGAAKCCK	2nlq	22.222	33.333	44.444	16.67	33.33	50	0	41.667	58.333	22.222	30.556	47.222	30.556	33.333	36.111
161	DHYNCVSSGGQCLYSACPIFTKIQGTCYRGEAKCCK	2nls	22.222	33.333	44.444	16.67	33.33	50	0	41.667	58.333	5.556	47.222	47.222	30.556	33.333	36.111
162	ATCDLASGFGVGSSLCAAHCIARRYRGGYCNSKAVCVCRN	2ny8	22.5	72.5	5	22.5	20	57.5	22.5	10	67.5	25	10	65	55	25	20
163	ATCDLASIFNVNHALCAAHCIARRYRGGYCNSKAVCVCRN	2nz3	27.5	15	57.5	22.5	20	57.5	22.5	10	67.5	25	10	65	32.5	25	42.5
164	FFHHIFRPIVHVGKTIHRLVTG	2ojn	59.091	0.5	40.909	33.33	0.5	66.67	72.727	0	27.273	90.909	0	9.091	95.455	0	4.545
165	FFHHIFRAIVHVAKTIHRLVTG	2ojo	100	0.5	0.5	56.67	0.5	43.33	81.818	4.545	13.636	90.909	0	9.091	95.455	0	4.545
166	YPAKPEAPGEDASAEELSRYYASLRHYLNLVTRQRY	2oon	44.444	0.5	55.556	44.44	0.5	55.56	47.222	0	52.778	52.778	0	47.222	52.778	0	47.222
167	YPAKPEYPGEDASPEELSRYYASLRHYLNLVTRQRY	2oop	50	0.5	50	41.67	0.5	58.33	44.444	0	55.556	52.778	0	47.222	52.778	0	47.222
168	SMWSGMWRRKLKKLRNALKKKLKGEK	2pco	69.231	0.5	30.769	53.33	0.5	46.67	76.923	0	23.077	80.769	0	19.231	92.308	0	7.692
169	DHYNCVSSGGQCLYSACPIFTRIQGTCYRGRARCCR	2plz	22.222	11.111	66.667	16.67	33.33	50	0	41.667	58.333	5.556	38.889	55.556	30.556	33.333	36.111
170	ACYCRIPACIAGEAAYGTCIYQGALWAFCC	2pm1	0.5	60	40	0.5	53.33	46.67	36.667	0	63.333	6.667	46.667	46.667	0	53.333	46.667
171	DCYCRIPACIAGEKKYGTCIYQGKLWAFCC	2pm4	0.5	60	40	0.5	53.33	46.67	0	36.667	63.333	0	56.667	43.333	0	53.333	46.667
172	DCYCRIPACIAGEAAYGTCIYQGALWAFCC	2pm5	0.5	60	40	0.5	53.33	46.67	36.667	6.667	56.667	6.667	46.667	46.667	0	53.333	46.667
173	CPKILKKCRRDSDCPGACICRGNGYCGSGSDGGV	2po8	23.529	17.647	58.824	17.65	23.53	58.82	17.647	11.765	70.588	20.588	11.765	67.647	8.824	29.412	61.765
174	ELDKWASLWNWFNITNWLWYIK	2pv6	95.455	0.5	4.545	53.33	3.33	43.33	81.818	0	18.182	63.636	27.273	9.091	95.455	0	4.545
175	KSCCPNTTGRDIYNTCRLGGGSRERCASLSGCKIISASTCPSDYPK	2v9b	52.174	8.696	39.13	43.48	8.7	47.83	13.043	17.391	69.565	32.609	15.217	52.174	45.652	8.696	45.652
176	KSCCPSTTGRNIYNTCRLTGSSRETCAKLSGCKIISASTCPSNYPK	3c8p	52.174	8.696	39.13	43.48	8.7	47.83	15.217	17.391	67.391	28.261	15.217	56.522	45.652	8.696	45.652
177	CGETCTLGTCYTAGCSCSWPVCTRNGVPI	3e4h	0.5	20.69	79.31	0.5	33.33	66.67	0	3.448	96.552	0	34.483	65.517	0	31.034	68.966
178	ACYCRIPACIAGERRYGTCIYAGRLWAFCC	3h6c	0.5	56.667	43.333	0.5	53.33	46.67	33.333	0	66.667	0	60	40	0	53.333	46.667
179	CGGACYCRIPACIAGERRYGTCIYQGRLWAFCC	3hj2	0.5	48.485	51.515	0.5	51.52	48.48	6.061	27.273	66.667	0	57.576	42.424	0	48.485	51.515
180	ACYCRIPACIAGERRAGTCIYQGRLWAFCC	3lo1	0.5	60	40	0.5	53.33	46.67	3.333	23.333	73.333	0	50	50	0	53.333	46.667
181	ACYCRIPACIAGERRYGTCIAQGRLWAFCC	3lo2	0.5	60	40	0.5	53.33	46.67	16.667	6.667	76.667	0	50	50	0	53.333	46.667
182	ACYCRIPACIAGERRYGTCIYQGALWAFCC	3lo4	0.5	56.667	43.333	0.5	53.33	46.67	30	3.333	66.667	0	56.667	43.333	0	53.333	46.667
183	ACYCRIPACIAGERRYGTCIYQGRLWAACC	3loe	0.5	60	40	0.5	53.33	46.67	13.333	13.333	73.333	0	56.667	43.333	0	53.333	46.667
184	ACYCRAPACIAGERRYGTCIYQGRLWAFCC	3lvx	0.5	60	40	0.5	53.33	46.67	0	23.333	76.667	0	50	50	0	53.333	46.667
185	KDRPKKPGLCPPRPQKPCVKECKNDDSCPGQQKCCNYGCKDECRDPIFVG	3ngg	10	16	74	6	22	72	0	6	94	4	4	92	6	22	72
186	KTCENLADTFRGPCFTDGSCDDHCKNKEHLIKGRCRDDFRCWCTRNC	3psm	25.532	31.915	42.553	23.4	34.04	42.55	6.383	14.894	78.723	36.17	12.766	51.064	25.532	36.17	38.298
187	ACYCRIPACIAGERRYATCIYQGRLWAFCC	4du0	0.5	60	40	0.5	53.33	46.67	3.333	23.333	73.333	0	60	40	0	53.333	46.667
188	ACYCRIPACIAGERRAGTCIYQGRLWAACC	4lb1	0.5	56.667	43.333	0.5	53.33	46.67	13.333	13.333	73.333	0	50	50	0	53.333	46.667
189	ACYCRIPACIAGERRAGTCAYQGRAWAACC	4lb7	0.5	56.667	43.333	0.5	53.33	46.67	33.333	0	66.667	6.667	40	53.333	0	53.333	46.667
190	ACYCRIPACIAGERRYGTCAYQGRLWAFCC	4lbb	0.5	60	40	0.5	53.33	46.67	3.333	23.333	73.333	0	60	40	0	53.333	46.667
191	ACYCRIPACIAGERRYGTCAYQGRAWAFCC	4lbf	0.5	53.333	46.667	0.5	53.33	46.67	0	26.667	73.333	0	50	50	0	53.333	46.667
192	ACQCPDAISGWTHTDYQCHGLENKMYRHVYAICMNGTQVYCRTEWGSSC	4ozk	0.5	61.224	38.776	14.29	28.57	57.14	0	34.694	65.306	12.245	28.571	59.184	0	61.224	38.776
193	GLPVCAETCVGGTCNTPGCTCSWPVCTRNG	4ttn	0.5	20	80	0.5	26.67	73.33	0	23.333	76.667	0	23.333	76.667	0	37.931	62.069
194	GLPVCGETCVGGTCNTPGCTCSWPACTRNG	4tto	0.5	20	80	0.5	26.67	73.33	0	30	70	0	23.333	76.667	0	37.931	62.069
195	GIGKFLHAAKKFGKAFVAEIMNS	5cgo	91.304	0.5	8.696	56.67	0.5	43.33	86.957	0	13.043	91.304	0	8.696	91.304	0	8.696
196	LRVRRTLQCSCRRVCRNTCSCIRLSRSTYAS	5gwg	0.5	32.258	67.742	12.9	35.48	51.61	38.71	12.903	48.387	51.613	12.903	35.484	0	45.161	54.839
197	FIHHIIGGLFSAGKAIHRLIRRRRR	5h2s	76	0.5	24	53.33	3.33	43.33	88	0	12	96	0	4	96	0	4
198	IFGAIWPLALGALKNLIK	5j6t	100	0.5	0.5	33.33	0.5	66.67	77.778	0	22.222	83.333	0	16.667	77.778	0	22.222
199	DIFGAIWPLALGALKNLIK	5j6v	78.947	0.5	21.053	33.33	3.33	63.33	73.684	0	26.316	94.737	0	5.263	84.211	0	15.789
200	KIFGAIWPLALGALKNLIK	5j6w	73.684	0.5	26.316	33.33	0.5	66.67	84.211	0	15.789	89.474	0	10.526	94.737	0	5.263
201	MGIIAGIIKVIKSLIEQFTGK	5khb	66.667	0.5	33.333	46.67	0.5	53.33	80.952	0	19.048	85.714	0	14.286	90.476	0	9.524
202	QPFIPRPIDTCRLRNGICFPGICRRPYYWIGTCNNGIGSCCARGWRS	5lcs	6.383	34.043	59.574	6.38	31.91	61.7	14.894	12.766	72.34	27.66	17.021	55.319	17.021	36.17	46.809
203	ADDRCYRMCQRYHDRREKKQCKEGCRYG	5lm0	82.143	0.5	17.857	26.67	16.67	56.67	71.429	0	28.571	89.286	0	10.714	75	0	25
204	RWCVYAYRRVRGVLVRYRRCW	5m9u	0.5	85.714	14.286	0.5	50	50	0	80.952	19.048	28.571	57.143	14.286	0	76.19	23.81
205	RMCKTPSGKFKGYCVNNTNCKNVCRTEGFPTGSCDFHVAGRKCYCYKPCP	5nce	26	34	40	6	44	50	12	30	58	14	30	56	22	42	36
206	WGWKEVVQNGQTIFSAGQKLGNMVGKIVPLPFG	5ujr	78.788	0.5	21.212	21.21	24.24	54.55	60.606	6.061	33.333	69.697	0	30.303	78.788	0	21.212
207	KYYGNGVTCGKHSCSVDWGKATTCIINNGALAWATGGHQGNHKC	5ukz	34.091	13.636	52.273	9.09	18.18	72.73	36.364	13.636	50	11.364	27.273	61.364	40.909	18.182	40.909
208	GFCWYVCVYRNGVRVCYRRCN	5v0y	0.5	66.667	33.333	0.5	50	50	0	66.667	33.333	0	76.19	23.81	0	76.19	23.81
209	GFCWYVCARRNGARVCYRRCN	5v11	0.5	90.476	9.524	0.5	36.67	63.33	0	57.143	42.857	0	71.429	28.571	0	76.19	23.81
210	GGVCPKILQRCRRDSDCPGACICRGNGYCGSGSD	5wov	32.353	0.5	67.647	8.82	23.53	67.65	26.471	11.765	61.765	23.529	11.765	64.706	8.824	29.412	61.765
211	GGVCPKILQRCRRDSDCPGACICRGNGYCGYPYDVPDYA	5wow	0.5	0.5	100	7.69	20.51	71.79	20.513	10.256	69.231	20.513	10.256	69.231	7.692	20.513	71.795
212	GLGSVFGRLARILGRVIPKV	5x3l	45	0.5	55	26.67	0.5	73.33	70	0	30	90	0	10	80	0	20
213	GFGCPFNQGKCHRHCRSIRRRGGYCDGFLKQRCVCYRK	5xa6	28.947	0.5	71.053	7.89	42.11	50	23.684	18.421	57.895	47.368	18.421	34.211	28.947	26.316	44.737
214	GSKKPVPIIYCNAATGKCQRM	5xol	0.5	0.5	100	0.5	26.67	73.33	0	42.857	57.143	0	38.095	61.905	0	38.095	61.905
215	GFAWNVCVYRNGVRVCHRRAN	5y0h	0.5	57.143	42.857	0.5	46.67	53.33	0	52.381	47.619	0	71.429	28.571	0	76.19	23.81
216	GFCWNVCVYRNGVRVCHRRCN	5y0i	0.5	85.714	14.286	0.5	40	60	0	66.667	33.333	14.286	57.143	28.571	0	76.19	23.81
217	AFCWNVCVYRNAVRVCHRRCN	5y0j	0.5	76.19	23.81	0.5	33.33	66.67	4.762	47.619	47.619	52.381	28.571	19.048	0	76.19	23.81
218	NLCASLRARHTIPQCRKFGRR	5z1y	61.905	0.5	38.095	16.67	0.5	83.33	57.143	0	42.857	80.952	0	19.048	42.857	0	57.143
219	AGECVRGRCPGGLCCSKFGFCGSGPAYCGG	5zv6	0.5	20	80	6.67	33.33	60	0	6.667	93.333	10	6.667	83.333	0	30	70
220	ARECKTESNTFPGICITKPPCRKACISEKFTDGHCSKILRRCLCTKPC	6b55	25	35.417	39.583	20.83	31.25	47.92	6.25	31.25	62.5	14.583	22.917	62.5	22.917	31.25	45.833
221	GSACQFWSCNSSCISRGYRQGYCWGIQYKYCQCQ	6b9w	32.353	11.765	55.882	2.94	52.94	44.12	0	35.294	64.706	11.765	47.059	41.176	32.353	23.529	44.118
222	GSACQFWSCNSSCISRGYRQGKCWGIQYKYCQCQ	6bam	29.412	17.647	52.941	2.94	52.94	44.12	0	38.235	61.765	26.471	50	23.529	32.353	23.529	44.118
223	GMACQFWSCNSSCISRGYRQGKCWGIQYKYCQCY	6bb6	38.235	11.765	50	2.94	52.94	44.12	0	41.176	58.824	26.471	50	23.529	32.353	23.529	44.118
224	GMACQFWSCNSSCISRGYRQGKCWGKYCQCY	6bi5	41.935	19.355	38.71	3.23	48.39	48.39	0	12.903	87.097	45.161	22.581	32.258	35.484	25.806	38.71
225	VFQFLGKIIHHVGNFVHGFSHVF	6c41	100	0.5	0.5	20	20	60	69.565	13.043	17.391	95.652	0	4.348	95.652	0	4.348
226	IWLTALKFLGKNLGKLAKQQLAKL	6cl3	100	0.5	0.5	70	0.5	30	87.5	0	12.5	95.833	0	4.167	95.833	0	4.167
227	GLPICGETCLLGKCYTPGCSCRRPVCYKNG	6dhr	0.5	20.69	79.31	0.5	46.67	53.33	0	31.034	68.966	0	26.667	73.333	0	44.828	55.172
228	VCSCRLVFCRRTELRVGNCLIGAVSFTYCCTRV	6dmm	0.5	63.636	36.364	0.5	57.58	42.42	27.273	18.182	54.545	0	78.788	21.212	0	63.636	36.364
229	VCSCRLVFCRRTELRVGNCLIGGVSFAYCCTRV	6dmq	0.5	63.636	36.364	0.5	57.58	42.42	18.182	24.242	57.576	0	75.758	24.242	0	66.667	33.333
230	RTCQSQSHRFRGPCLRRSNCANVCRTEGFPGGRCRGFRRRCFCTTHC	6dmz	25.532	31.915	42.553	10.64	34.04	55.32	8.511	25.532	65.957	14.894	36.17	48.936	23.404	36.17	40.426
231	GIGAVLKVLTTGLPALISWIKRKRQQ	6dst	88.462	0.5	11.538	46.67	0.5	53.33	73.077	0	26.923	92.308	0	7.692	92.308	0	7.692
232	FLPIIINLKALAALAKKIL	6duu	89.474	0.5	10.526	46.67	0.5	53.33	89.474	0	10.526	63.158	21.053	15.789	94.737	0	5.263
233	ACDTATCVTHRLAGLLSRSGGVVKNNFVPTNVGSKAF	6e3y	37.838	0.5	62.162	24.32	13.51	62.16	40.541	0	59.459	48.649	0	51.351	45.946	0	54.054
234	TKLTEEEKNRLNFLKKISQRYQKFALPQYLK	6fs4	58.065	0.5	41.935	64.52	0.5	35.48	61.29	0	38.71	74.194	0	25.806	83.871	0	16.129
235	GIGGKILSGLKTALKGAAKELASTYLH	6hz2	96.296	0.5	3.704	60	0.5	40	81.481	0	18.519	92.593	0	7.407	92.593	0	7.407
236	GFGCNGPWNEDDLRCHNHCKSIKGYKGGYCAKGGFVCKCY	6k50	35	15	50	25	25	50	10	10	80	30	17.5	52.5	32.5	25	42.5
237	GFGCNGPWQEDDLKCHNHCKSIKGYKGGYCAKGGFVCKCY	6k51	27.5	15	57.5	25	25	50	12.5	10	77.5	25	17.5	57.5	25	25	50
238	RRTCRCRFGRCFRRESYSGSCNINGRIFSLCCR	6kra	0.5	57.576	42.424	0.5	66.67	33.33	6.061	36.364	57.576	0	60.606	39.394	0	57.576	42.424
239	ACQCPDAISGWTHTDYQCHGLEKKMYRHVYAICMNGSQVYCRTEWGSSC	6lwy	0.5	59.184	40.816	16.33	28.57	55.1	0	34.694	65.306	22.449	22.449	55.102	0	61.224	38.776
240	ARQCKAESNTFTGICIAKPPCRQACIREKFTDGHCSKVLRRCLCTKRC	6mry	25	31.25	43.75	20.83	31.25	47.92	6.25	31.25	62.5	14.583	22.917	62.5	22.917	31.25	45.833
241	KTCENLSGTFKGPCIPDGNCNKHCRNNEHLLSGRCRDDFRCWCTNRC	6nom	19.149	17.021	63.83	4.26	46.81	48.94	12.766	17.021	70.213	27.66	17.021	55.319	21.277	31.915	46.809
242	AGKETIRQYLKNEIKKKGRKAVIAW	6o8j	24	0.5	76	50	6.67	43.33	60	24	16	60	24	16	92	0	8
243	AGKEKIRKKLKNEIKKKGRKAVIAW	6o8p	0.5	0.5	100	53.33	10	36.67	60	24	16	68	20	12	92	0	8
244	AWKEKIRKKLKNEIKKKGRKAVIAW	6o8r	20	0.5	80	60	6.67	33.33	60	24	16	72	20	8	96	0	4
245	AGKEKIRKKLKNEIKKKWRKAVIAW	6o8s	0.5	0.5	100	63.33	6.67	30	76	16	8	92	0	8	96	0	4
246	AWKEKIRKKLKNEIKKKWRKAVIAW	6o8t	20	0.5	80	70	3.33	26.67	76	16	8	96	0	4	96	0	4
247	FETLRGDERILSILRHQNLLKELQD	6r2x	64	0.5	36	56.67	0.5	43.33	72	0	28	84	0	16	92	0	8
248	GWGSFFRRAAHVGRHVGRAALTHYL	6rsf	20	0.5	80	70	3.33	26.67	84	0	16	96	0	4	92	0	8
249	GWGSFFKKAAHAGKHAGKAALTHYL	6rsg	0.5	0.5	100	73.33	0.5	26.67	68	0	32	96	0	4	92	0	8
250	GRRKRKWLRRIGKGVKIIGGAALDHL	6ry9	23.077	0.5	76.923	46.67	6.67	46.67	42.308	11.538	46.154	80.769	0	19.231	92.308	0	7.692
251	WLRRIGKGVKIIGGAALDHL	6ryq	30	0.5	70	30	6.67	63.33	20	15	65	45	20	35	95	0	5
252	FLGALIKGAIHGGRFIHGMIQNHH	6rz1	0.5	0.5	100	33.33	6.67	60	25	25	50	83.333	0	16.667	95.833	0	4.167
253	GWGSIFKHGRHAAKHIGHAAVNHYL	6rzc	0.5	0.5	100	43.33	6.67	50	64	0	36	96	0	4	92	0	8
254	GKGRWLERIGKAGFIIIGGALDHL	6s2d	25	0.5	75	43.33	6.67	50	29.167	20.833	50	45.833	20.833	33.333	95.833	0	4.167
255	KTCENLADTYKGPCFTTGSCDDHCKNKEHLRSGRCRDDFRCWCTKNC	6vpn	25.532	31.915	42.553	21.28	31.91	46.81	6.383	8.511	85.106	38.298	12.766	48.936	25.532	36.17	38.298
256	GIGDILKNLAKAAGKAALHAVGESL	6wpo	100	0.5	0.5	70	0.5	30	84	0	16	96	0	4	92	0	8
257	RTCESQSHKFKGPCLRASNCANVCKTEGFHGGKCRGFRRRCFCTKHC	7c2p	23.404	36.17	40.426	14.89	38.3	46.81	8.511	23.404	68.085	19.149	31.915	48.936	23.404	36.17	40.426
258	RVCESQSHKFEGACMGDHNCALVCRNEGFSGGKCKGLRRRCFCTKLC	7c31	25.532	36.17	38.298	12.77	34.04	53.19	8.511	25.532	65.957	14.894	34.043	51.064	23.404	36.17	40.426
259	GLPVCGETCVGGTCNTPGCVCSWPVCTRN	7k7x	0.5	0.5	100	0.5	30	70	0	31.034	68.966	0	27.586	72.414	0	37.931	62.069
260	AIPCGESCVYIPCISVVIGCSCRNKVCYR	7kpd	17.241	37.931	44.828	10	36.67	53.33	17.241	24.138	58.621	3.448	44.828	51.724	10.345	37.931	51.724
261	MITISTMLQFGLFLIALIGLVIKLIELSNKK	7ns1	87.097	0.5	12.903	74.19	6.45	19.35	80.645	0	19.355	87.097	0	12.903	87.097	0	12.903
