# Supplementary material for: Benchmarking protein structure predictors to assist machine learning-guided peptide discovery
Source: Royal Society of Chemistry journal article supplement (doi:10.1039/d3dd00045a), 2023-01-01
Supplement: d3dd00045a4.csv [file d3dd00045a4.csv]

	peptide_sequence	pdb_id	AF_best_model_pLDDT	AF_best_model_pTM	model_number	length	method	general_solvent_conditions	specific_solvent_conditions
1	AVVKVPLKKFKSIRETMKEKGLLGEF	1avf	92.8	0.39	5	26	X-RAY DIFFRACTION	N/A	N/A
2	CGESCVWIPCISAALGCSCKNKVCYRNGIP	1bh4	90.6	0.479	3	30	SOLUTION NMR	water	Water
3	LCNERPSQTWSGNCGNTAHCDKQCQDWEKASHGACHKRENHWKCFCYFNC	1bk8	90.9	0.657	3	50	SOLUTION NMR	water	Water
4	APLSCGRNGGVCIPIRCPVPMRQIGTCFGRPVKCCRSW	1bnb	85.4	0.542	3	38	SOLUTION NMR	water	Water
5	YSRCQLQGFNCVVRSYGLPTIPCCRGLTCRSYFPGSTYGRCQRY	1cix	84.2	0.529	3	44	SOLUTION NMR	water	Water
6	VNYGNGVSCSKTKCSVNWGQAFQERYTAGINSFVSGVASGAGSIGRRP	1cw5	60.7	0.297	3	48	SOLUTION NMR	mixture	Water:TFE mixture
7	RSVCRQIKICRRRGGCYYKCTNRPY	1cz6	83.8	0.311	4	25	SOLUTION NMR	water	Water
8	DCYCRIPACIAGERRYGTCIYQGRLWAFCC	1dfn	94.5	0.533	3	30	X-RAY DIFFRACTION	N/A	N/A
9	AGCIKNGGRCNASAGPPYCCSSYCFQIAGQSYGVCKNR	1dkc	79.4	0.48	4	38	SOLUTION NMR	DSS	Sodium 4,4-dimethyl-4-silapentane-1-sulfonate
10	GIGKYLHSAKKFGKAWVGEIMNS	1dum	90.5	0.265	3	23	SOLUTION NMR	micelles	DPC micelles
11	PVTCLKSGAICHPVFCPRRYKQIGTCGLPGTKCCKKP	1e4q	91.4	0.611	3	37	SOLUTION NMR	water	Water
12	YPSKPDNPGEDAPAEDLARYYSALRHYINLITRQRY	1f8p	88.8	0.554	3	36	SOLUTION NMR	micelles	DPC micelles
13	GFGCPNNYQCHRHCKSIPGRCGGYCGGWHRLRCTCYRCG	1fjn	87.7	0.552	3	39	SOLUTION NMR	water	Water
14	RGLRRLGRKIAHGVKKYGPTVLRIIRIAG	1fry	69.1	0.228	4	29	SOLUTION NMR	mixture	Water:TFE mixture
15	YPSKPDNPGEDAPAEDLARYYSALRHYINLAARQRY	1fvn	85.1	0.516	3	36	SOLUTION NMR	water	Water
16	DKLIGSCVWGAVNYTSDCNGECKRRGYKGGHCGSFANVNCWCET	1i2u	95.6	0.686	3	44	SOLUTION NMR	buffer	Sodium acetate buffer
17	DKLIGSCVWGAVNYTSDCNGECLLRGYKGGHCGSFANVNCWCET	1i2v	95.3	0.682	3	44	SOLUTION NMR	buffer	Sodium acetate buffer
18	ATCDLLSGTGINHSACAAHCLLRGNRGGYCNGKGVCVCRN	1ica	77.3	0.484	3	40	SOLUTION NMR	water	Water
19	YPSKPDNPGEDAPAEDLARYYSALRHYINLAPRQRY	1icy	83.1	0.495	3	36	SOLUTION NMR	micelles	DPC micelles
20	ELPKLPDDKVLIRSRSNCPKGKVWNGFDCKSPFAFS	1iyc	53.3	0.159	1	36	SOLUTION NMR	water	Water
21	KTCEHLADTYRGVCFTNASCDDHCKNKAHLISGTCHNWKCFCTQNC	1jkz	89.4	0.623	3	46	SOLUTION NMR	buffer	Sodium phosphate buffer
22	KSCCPNTTGRNIYNTCRFGGGSRQVCASLSGCKIISASTCPSDYPK	1jmn	91.2	0.67	4	46	SOLUTION NMR	water	Water
23	KSCCPNTTGRNIYNTCRLGGGSRERCASLSGCKIISASTCPSDYPK	1jmp	91.1	0.669	4	46	SOLUTION NMR	water	Water
24	GIINTLQKYYCRVRGGRCAVLSCLPKEEQIGKCSTRGRKCCRRKK	1kj6	93.5	0.654	3	45	SOLUTION NMR	water	Water
25	AKIPIKAIKTVGKAVGKGLRAINIASTANDVFNFLKPKKRKA	1kv4	79.4	0.379	3	42	SOLUTION NMR	methanol	Methanol
26	ATCDLLSGTGINHSACAAHCLLRGNRGGYCNGKAVCVCRN	1l4v	76.5	0.476	3	40	SOLUTION NMR	methanol	Methanol
27	FKCRRWQWRMKKLGAPSITCVRRAF	1lfc	70.3	0.242	3	25	SOLUTION NMR	water	Water
28	GCLEFWWKCNPNDDKCCRPKLKCSKLFKLCNFSF	1lu8	91.8	0.563	3	34	SOLUTION NMR	water	Water
29	SSMKLSFRARAYGFRGPGPQL	1lv4	67.8	0.192	5	21	SOLUTION NMR	water	Water
30	GLRKRLRKFRNKIKEKLKKIGQKIQGLLPKLA	1lyp	90.2	0.42	3	32	SOLUTION NMR	water	Water
31	ICIFCCGCCHRSKCGMCCKT	1m4e	86.6	0.084	3	20	SOLUTION NMR	water	Water
32	ACNFQSCWATCQAQHSIYFRRAFCDRSQCKCVFVRG	1mm0	92.6	0.572	5	36	SOLUTION NMR	water	Water
33	VGECVRGRCPSGMCCSQFGYCGKGPKYCGR	1mmc	85.1	0.427	3	30	SOLUTION NMR	water	Water
34	DCLSGRYKGPCAVWDNETCRRVCKEEGRSSGHCSPSLKCWCEGC	1myn	91.2	0.616	1	44	SOLUTION NMR	water	Water
35	KYYGNGVHCGKHSCTVDWGTAIGCIGNNAAANWATGGNAGWNKC	1ohm	82.8	0.487	4	44	SOLUTION NMR	micelles	DPC micelles
36	VCGETCVGGTCNTPGCTCSWPVCT	1orx	95.1	0.354	5	24	SOLUTION NMR	water	Water
37	DKLIGSCVWGAVNYTSNCNAECKRRGYKGGHCGSFANVNCWCET	1ozz	96.1	0.696	3	44	SOLUTION NMR	buffer	Sodium acetate buffer
38	DKLIGSCVWGAVNYTSNCRAECKRRGYKGGHCGSFANVNCWCET	1p00	94.8	0.68	3	44	SOLUTION NMR	buffer	Sodium acetate buffer
39	DKLIGSCVWGAVNYTSNCNAECKRRGYKGGHCGSFLNVNCWCET	1p0a	95.3	0.682	3	44	SOLUTION NMR	buffer	Sodium acetate buffer
40	AKKVFKRLEKLFSKIQNDK	1p0g	93.9	0.106	3	19	SOLUTION NMR	micelles	SDS micelles
41	AKKVFKRLEKLFSKIWNDK	1p0l	91.7	0.095	3	19	SOLUTION NMR	micelles	SDS micelles
42	AKKVFKRLEKLFSKIWNWK	1p0o	88.7	0.088	3	19	SOLUTION NMR	micelles	SDS micelles
43	AKKVFKRLEKSFSKIQNDK	1p5k	93.3	0.103	3	19	SOLUTION NMR	micelles	SDS micelles
44	AKKVSKRLEKLFSKIQNDK	1p5l	88.7	0.104	3	19	SOLUTION NMR	micelles	SDS micelles
45	NKGCATCSIGAACLVDGPIPDFEIAGATGLFGLWG	1pxq	58.6	0.189	4	35	SOLUTION NMR	micelles	SDS micelles
46	CIKNGNGCQPNGSQGNCCSGYCHKQPGWVAGYCRRK	1q3j	88.5	0.509	3	36	SOLUTION NMR	buffer	Sodium acetate buffer
47	YPSKPDNPGEDAPAEDMARYYSALRHYINLITRQRY	1ron	90.4	0.575	3	36	SOLUTION NMR	water	Water
48	GCRFCCNCCPNMSGCGVCCRF	1s6w	90.3	0.27	3	21	SOLUTION NMR	water	Water
49	RTCMIKKEGWGKCLIDTTCAHSCKNRGYIGGNCKGMTRTCYCLVNC	1ti5	87.8	0.62	3	46	SOLUTION NMR	water	Water
50	GCLEFWWKCNPNDDKCCRPKLKCSKLFKLCNFSF	1tyk	91.8	0.563	3	34	SOLUTION NMR	water	Water
51	YPSKPDNPGEDAPAEDLAQYAADLRHYINLITRQRY	1tz4	88.1	0.54	3	36	SOLUTION NMR	micelles	DPC micelles
52	EIAALEKEIAALEKEIAALEK	1u0i	95.6	0.331	4	21	SOLUTION NMR	mixture	Water:TFE mixture
53	SFGLCRLRRGFCARGRCRFPSIPIGRCSRFVQCCRRVW	1ut3	91.6	0.583	3	38	SOLUTION NMR	water	Water
54	CAESCVWIPCTVTALLGCSCSNKVCYNGIP	1vb8	87.5	0.466	3	30	SOLUTION NMR	mixture	Water:Acetonitrile mixture
55	ASIVKTTIKAAKKLCRGFTLTCGCHFTGKK	1w9n	61.1	0.261	2	30	SOLUTION NMR	water	Water
56	GKIPVKAIKKAGAAIGKGLRAINIASTAHDVYSFFKPKHKKK	1x22	78.2	0.395	3	42	SOLUTION NMR	methanol	Methanol
57	HSSGYTRPLRKPSRPIFIRPIGCDVCYGIPSSTARLCCFRYGDCCHL	1xv3	61.5	0.313	4	47	SOLUTION NMR	water	Water
58	KSSAYSLQMGATAIKQVKKLFKKWGW	1ytr	78.4	0.293	3	26	SOLUTION NMR	micelles	DPC micelles
59	GWGSFFKKAAHVGKHVGKAALTHYL	1z64	80.1	0.272	3	25	SOLUTION NMR	micelles	DPC micelles
60	VCSCRLVFCRRTELRVGNCLIGGVSFTYCCTRV	1zmm	93.8	0.549	5	33	X-RAY DIFFRACTION	N/A	N/A
61	VGECVRGRCPSGMCCSQFGFCGKGPKYCGR	1znt	84	0.423	4	30	SOLUTION NMR	TCT	N,N,N-triacetylchitotriose
62	RGFRKHFNKLVKKVKHTISETAHVAKDTAVIAGSGAAVVAAT	1zrx	73.2	0.344	3	42	SOLUTION NMR	mixture	Water:TFE mixture
63	VGECVRGRCPSGMCCSQWGYCGKGPKYCGR	1zuv	86.8	0.456	3	30	SOLUTION NMR	buffer	Sodium phosphate buffer
64	VGECVRGRCPSGMCCSQAGYCGKGPKYCGR	1zwu	85.1	0.441	3	30	SOLUTION NMR	buffer	Sodium phosphate buffer
65	ARSYGNGVYCNNKKCWVNRGEATQSIIGGMISGWASGLAGM	2a2b	63.4	0.242	3	41	SOLUTION NMR	micelles	DPC micelles
66	RVKRVWPLVIRTVIAGYNLYRAIKKK	2amn	88.1	0.348	3	26	SOLUTION NMR	mixture	Water:TFE mixture
67	RRWCFRVCYRGRFCYRKCR	2b5k	90.4	0.085	3	19	SOLUTION NMR	micelles	DPC micelles
68	GFGCPGNQLKCNNHCKSISCRAGYCDAATLWLRCTCTDCNGKK	2b68	83.3	0.515	3	43	SOLUTION NMR	water	Water
69	YVSCLFRGARCRVYSGRSCCFGYYCRRDFPGSIFGTCSRRNF	2dcv	83.6	0.527	3	42	SOLUTION NMR	water	Water
70	YITCLFRGARCRVYSGRSCCFGYYCRRDFPGSIFGTCSRRNF	2dcw	83.1	0.522	3	42	SOLUTION NMR	water	Water
71	YPIKPEAPGEDASPEELNRYYASLRHYLNLVTRQRY	2dez	84.9	0.493	3	36	SOLUTION NMR	water	Water
72	IKPEAPGEDASPEELNRYYASLRHYLNLVTRQRY	2df0	84.3	0.454	3	34	SOLUTION NMR	water	Water
73	ATCDLASKWNWNHTLCAAHCIARRYRGGYCNSKAVCVCRN	2e3g	79.2	0.487	3	40	SOLUTION NMR	buffer	Sodium acetate buffer
74	CGESCVFIPCISTLLGCSCKNKVCYRNGVIP	2eri	88.7	0.479	3	31	SOLUTION NMR	mixture	Water:Acetonitrile mixture
75	IGKEFKRIVQRIKDFLRNLVPRTES	2fcg	82.6	0.334	3	25	SOLUTION NMR	micelles	SDS micelles
76	SAISCGETCFKFKCYTPRCSCSYPVCK	2fqa	89.3	0.428	4	27	SOLUTION NMR	water	Water
77	GILDTLKQFAKGVGKDLVKGAAQGVLSTVSCKLAKTC	2g9l	74.8	0.288	3	37	SOLUTION NMR	mixture	Water:Methanol mixture
78	GLFGKLIKKFGRKAISYAVKKARGKH	2g9p	80.7	0.279	5	26	SOLUTION NMR	micelles	SDS micelles
79	LVQRGRFGRFLRKIRRFRPKVTITIQGSARF	2gdl	68.4	0.266	3	31	SOLUTION NMR	mixture	Water:TFE mixture
80	KTCENLANTYRGPCFTTGSCDDHCKNKEHLRSGRCRDDFRCWCTRNC	2gl1	96.9	0.757	3	47	SOLUTION NMR	buffer	Sodium phosphate buffer
81	KRFWPLVPVAINTVAAGINLYKAIRRK	2hfr	89.5	0.375	3	27	SOLUTION NMR	mixture	Water:TFE mixture
82	SGSLSTFFRLFNRSFTQALGK	2i2j	89.9	0.284	5	21	SOLUTION NMR	mixture	Water:TFE mixture
83	KWKVFKKIEKKWKVFKKIEKAGPKWKVFKKIEK	2igr	81.1	0.387	5	33	SOLUTION NMR	mixture	Water:HFP mixture
84	GVCPKILKKCRRDSDCPGACICRGNGYCG	2it8	90.4	0.468	5	29	SOLUTION NMR	water	Water
85	FLSLIPHAINAVSTLVHHF	2jpy	88.1	0.105	4	19	SOLUTION NMR	mixture	Water:TFE mixture
86	FLSLIPHAINAVSAIAKHN	2jq0	85.4	0.097	4	19	SOLUTION NMR	mixture	Water:TFE mixture
87	FLSLIPHAINAVSALANHG	2jq1	88.2	0.103	4	19	SOLUTION NMR	mixture	Water:TFE mixture
88	GKIPVKAIKQAGKVIGKGLRAINIAGTTHDVVSFFRPKKKKH	2jr8	77.1	0.402	3	42	SOLUTION NMR	methanol	Methanol
89	RWCVYAYVRVRGVLVRYRRCW	2jsb	92.2	0.214	3	21	SOLUTION NMR	water	Water
90	CGETCTLGTCYTQGCTCSWPICKRNGLPV	2jwm	87.2	0.461	3	29	SOLUTION NMR	micelles	DPC Micelles
91	GILSSFKGVAKGVAKDLAGKLLETLKCKITGC	2k10	83.7	0.335	1	32	SOLUTION NMR	water	Water
92	RRTCHCRSRCLRRESNSGSCNINGRIFSLCCR	2k1i	91.8	0.479	3	32	SOLUTION NMR	mixture	Water:TFE mixture
93	GFGALFKFLAKKVAKTVAKQAAKQGAKYVVNKQME	2k38	77.1	0.333	3	35	SOLUTION NMR	mixture	Water:TFE mixture
94	GVPICGETCTLGTCYTAGCSCSWPVCTRN	2k7g	91.6	0.509	3	29	SOLUTION NMR	water	Water
95	GIGKFLKKAKKGIGAVLKVLTTGL	2k98	85.9	0.218	3	24	SOLUTION NMR	micelles	LPS micelles
96	GRFKRFRKKFKKLFKKLSPVIPLLHL	2ket	78.1	0.288	3	26	SOLUTION NMR	mixture	Water:Ethanol mixture
97	KCNTATCATQRLANFLVRSSNNLGPVLPPTNVGSNTY	2kj7	77	0.371	2	37	SOLUTION NMR	micelles	DPC micelles
98	SGPNGQCGPGWGGCRGGLCCSQYGYCGSGPKYCAH	2kus	92	0.578	3	35	SOLUTION NMR	water	Water
99	GTPCGESCVYIPCISGVIGCSCTDKVCYLN	2kux	92	0.501	3	30	SOLUTION NMR	water	Water
100	MTPFWRGVSLRPIGASCRDDSECITRLCRKRRCSLSVAQE	2l1q	75.5	0.434	3	40	SOLUTION NMR	water	Water
101	GSGRGSCRSQCMRRHEDEPWRVQECVSQCRRRRGGGD	2l2r	80.3	0.512	3	37	SOLUTION NMR	water	Water
102	GIGKALKKAKKGIGAVLKVLTTGL	2l36	86.4	0.223	3	24	SOLUTION NMR	micelles	LPS micelles
103	GIRCPKSWKCKAFKQRVLKRLLAMLRQHAF	2l3i	77.3	0.346	3	30	SOLUTION NMR	micelles	DPC micelles
104	GLKEIFKAGLGSLVKGIAAHVAS	2l5r	93.3	0.278	5	23	SOLUTION NMR	water	Water
105	KKLKLAPAKLALLWKALALKLKKA	2l96	80.1	0.213	5	24	SOLUTION NMR	micelles	SDS micelles
106	KKLKLALAKPALLWKALALKLKKA	2l99	76.7	0.195	3	24	SOLUTION NMR	micelles	SDS micelles
107	KKLKLALAKLAPLWKALALKLKKA	2l9a	80	0.192	3	24	SOLUTION NMR	micelles	SDS micelles
108	RWKIFKKIEKVGRNVRDGIIKAGPAVAVVGQAATVVK	2la2	75.4	0.361	5	37	SOLUTION NMR	water	Water
109	GLPTCGETCTLGTCYVPDCSCSWPICMKN	2lam	92.8	0.515	3	29	SOLUTION NMR	mixture	Water:Acetonitrile mixture
110	AQRCGDQARGAKCPNCLCCGKYGFCGSGDAYCGAGSCQSQCRGC	2lb7	89.1	0.612	3	44	SOLUTION NMR	water	Water
111	AACSDRAHGHICESFKSFCKDSGRNGVKLRANCKKTCGLC	2lg4	91.7	0.598	4	40	SOLUTION NMR	water	Water
112	LFCKGGSCHFGGCPSHLIKVGSCFGFRSCCKWPWNA	2lg5	84.6	0.496	3	36	SOLUTION NMR	water	Water
113	LFCKGGSCHFGGCPSHLIKVGSCFGFRSCCAWPWNA	2lg6	84.9	0.502	3	36	SOLUTION NMR	water	Water
114	KTCENLSDSFKGPCIPDGNCNKHCKEKEHLLSGRCRDDFRCWCTRNC	2lj7	92	0.694	3	47	SOLUTION NMR	water	Water
115	KYYGNGVHSTKSGSSVNWGEAFSAGVHRLANGGNGFW	2ljq	59.7	0.266	3	37	SOLUTION NMR	mixture	Water:TFE mixture
116	KYYGNGVHLTKSGLSVNWGEAFSAGVHRLANGGNGFW	2ljt	58.1	0.266	3	37	SOLUTION NMR	mixture	Water:TFE mixture
117	ATCDLLSGTGVKHSACAAHCLLRGNRGGYCNGRAICVCRN	2lld	77.6	0.49	3	40	SOLUTION NMR	buffer	Sodium phosphate buffer
118	LLGDFFRKSKEKIGKEFKRIVQR	2lmf	93.8	0.286	3	23	SOLUTION NMR	water	Water
119	VTCDVLSFEAKGIAVNHSACALHCIALRKKGGSCQNGVCVCRN	2ln4	71.1	0.452	3	43	SOLUTION NMR	water	Water
120	DAEFRHDSGYEVHHQKLVFFAENVGSNKGAIIGLMVGGVV	2lnq	60.2	0.254	5	40	SOLID-STATE NMR	N/A	N/A
121	RTCESQSHKFKGPCASDHNCASVCQTERFSGGRCRGFRRRCFCTTHC	2lr3	92.3	0.658	3	47	SOLUTION NMR	water	Water
122	GFGCPFNENECHAHCLSIGRKFGFCAGPLRATCTCGKQ	2lr5	89.1	0.565	3	38	SOLUTION NMR	water	Water
123	RKCNFLCKLKEKLRTVITSHIDKVLRPQG	2lr7	86.7	0.392	3	29	SOLUTION NMR	water	Water
124	GWGSFFKKAAHVGKHVGKAALTHYL	2ls9	80.1	0.272	3	25	SOLUTION NMR	micelles	SDS micelles
125	GIGKFLHSAKKFGKAFVGEIMNS	2lsa	93.1	0.286	3	23	SOLUTION NMR	micelles	SDS micelles
126	GFGCPGDAYQCSEHCRALGGGRTGGYCAGPWYLGHPTCTCSF	2lt8	85.8	0.527	3	42	SOLUTION NMR	water	Water
127	GIINTLQKYYCRVRGAICHPVFCPRRYKQIGTCGLPGTKCCKKP	2lxo	93	0.643	3	44	SOLUTION NMR	water	Water
128	ADDRCERMCQRYHDRREKKQCMKGCRYG	2m6a	84.6	0.403	3	28	SOLUTION NMR	water	Water
129	ADRGWIKTLTKDCPNVISSICAGTIITACKNCA	2m8v	51.4	0.158	4	33	SOLUTION NMR	buffer	Sodium acetate buffer
130	GLPVCGETCTLGTCYTQGCTCSWPICKRN	2m9o	91.8	0.506	3	29	SOLUTION NMR	water	Water
131	GIGKFLHSAKKFGKAFVGEIMNS	2mag	93.1	0.286	3	23	SOLUTION NMR	micelles	DPC micelles
132	GLPRKILCAIAKKKGKCKGPLKLVCKC	2mbd	90.5	0.422	3	27	SOLUTION NMR	water	Water
133	TCHIRRKPKFRKFKLYHEGKFWCP	2mdl	72.4	0.134	3	24	SOLUTION NMR	water	Water
134	CVLIGQRCDNDRGPRCCSGQGNCVPLPFLGGVCAV	2mfs	81.3	0.45	3	35	SOLUTION NMR	water	Water
135	GIGGVLLSAGKAALKGLAKVLAEKYAN	2mhw	87	0.344	5	27	SOLUTION NMR	micelles	SDS micelles
136	GLGKAQCAALWLQCASGGTIGCGGGAVACQNYRQFCR	2mij	80.7	0.481	3	37	SOLUTION NMR	water	Water
137	GLFGVLAKVAGHVVGAIAEHF	2mmj	93.7	0.298	4	21	SOLUTION NMR	micelles	DPC micelles
138	GGLKKLGKKLEGAGKRVFKASEKALPVVVGIKAIGK	2mmm	87.3	0.432	5	36	SOLUTION NMR	mixture	Water:TFE mixture
139	GGAGHVPEYFVRGDFPISFYG	2mmt	60.4	0.122	3	21	SOLUTION NMR	methanol	Methanol
140	GGAGHVPEYFVRGDTPISFYG	2mmw	63.8	0.116	3	21	SOLUTION NMR	methanol	Methanol
141	GLPVCGETCVGGTCNTPGCTCSWWPVCTRN	2mn1	89.7	0.503	3	30	SOLUTION NMR	mixture	Water:Acetonitrile mixture
142	DAEFRHDSGYEVHHQKLVFFADVGSNKGAIIGLMVGGVV	2mvx	57.8	0.159	2	39	SOLID-STATE NMR	N/A	N/A
143	KRFKKFFKKVKKSVKKRLKKIFKKPMVIGVTIPF	2mwt	78.2	0.363	3	34	SOLUTION NMR	micelles	DPC micelles
144	FEDLPNFGHIQVKVFNHGEHIHH	2n1c	61.8	0.125	3	23	SOLUTION NMR	water	Water
145	VKVKVKVKVPPTKVKVKVKV	2n1e	89.2	0.087	5	20	SOLID-STATE NMR	N/A	N/A
146	FEDLPNFGHIQVKVFNHGEHIHH	2n30	61.8	0.125	3	23	SOLUTION NMR	methanol	Methanol
147	KYYGNGVSCNKKGCSVDWGKAIGIIGNNAAANLTTGGKAGWKG	2n4k	72.4	0.348	5	43	SOLUTION NMR	mixture	Water:TFE mixture
148	SWLSKTAKKLENSAKKRISEGIAIAIQGGPR	2n92	85.4	0.374	3	31	SOLUTION NMR	micelles	LPS micelles
149	IKPEAPGEDASPEELNRYYASLRHYLNLVTRQRY	2na5	84.3	0.454	3	34	SOLUTION NMR	water	Water
150	GLNALKKVFQGIHEAIKLINNHVQ	2ncx	91.8	0.276	3	24	SOLUTION NMR	micelles	DPC micelles
151	GLNALKKVFQPIHEAIKLINNHVQ	2ncy	89.8	0.266	3	24	SOLUTION NMR	micelles	DPC micelles
152	DHYACVSSGGQCLYSACPIFTKIQGTCYRGKAKCCK	2nlb	95.7	0.619	3	36	X-RAY DIFFRACTION	N/A	N/A
153	DHYNCVSAGGQCLYSACPIFTKIQGTCYRGKAKCCK	2nlc	94.9	0.603	3	36	X-RAY DIFFRACTION	N/A	N/A
154	DHYNCVSSGGACLYSACPIFTKIQGTCYRGKAKCCK	2nld	96	0.632	5	36	X-RAY DIFFRACTION	N/A	N/A
155	DHYNCVSSGGQCAYSACPIFTKIQGTCYRGKAKCCK	2nle	95.1	0.607	3	36	X-RAY DIFFRACTION	N/A	N/A
156	DHYNCVSSGGQCEYSACPIFTKIQGTCYRGKAKCCK	2nlf	94.9	0.604	3	36	X-RAY DIFFRACTION	N/A	N/A
157	DHYNCVSSGGQCLYSACPIFTEIQGTCYRGKAKCCK	2nlg	96.1	0.629	3	36	X-RAY DIFFRACTION	N/A	N/A
158	DHYNCVSSGGQCLYSACPIFTKIAGTCYRGKAKCCK	2nlh	95.6	0.619	3	36	X-RAY DIFFRACTION	N/A	N/A
159	DHYNCVSSGGQCLYSACPIFTKIEGTCYRGKAKCCK	2nlp	96	0.628	5	36	X-RAY DIFFRACTION	N/A	N/A
160	DHYNCVSSGGQCLYSACPIFTKIQGTCYRGAAKCCK	2nlq	95.9	0.629	5	36	X-RAY DIFFRACTION	N/A	N/A
161	DHYNCVSSGGQCLYSACPIFTKIQGTCYRGEAKCCK	2nls	95.6	0.62	5	36	X-RAY DIFFRACTION	N/A	N/A
162	ATCDLASGFGVGSSLCAAHCIARRYRGGYCNSKAVCVCRN	2ny8	81.4	0.523	3	40	SOLUTION NMR	buffer	Sodium acetate buffer
163	ATCDLASIFNVNHALCAAHCIARRYRGGYCNSKAVCVCRN	2nz3	78.8	0.492	3	40	SOLUTION NMR	buffer	Sodium acetate buffer
164	FFHHIFRPIVHVGKTIHRLVTG	2ojn	87.8	0.251	3	22	SOLUTION NMR	micelles	SDS micelles
165	FFHHIFRAIVHVAKTIHRLVTG	2ojo	92.6	0.273	3	22	SOLUTION NMR	micelles	SDS micelles
166	YPAKPEAPGEDASAEELSRYYASLRHYLNLVTRQRY	2oon	85	0.498	3	36	SOLUTION NMR	buffer	Sodium acetate buffer
167	YPAKPEYPGEDASPEELSRYYASLRHYLNLVTRQRY	2oop	85.7	0.506	3	36	SOLUTION NMR	buffer	Sodium acetate buffer
168	SMWSGMWRRKLKKLRNALKKKLKGEK	2pco	86.3	0.347	3	26	SOLUTION NMR	micelles	SDS micelles
169	DHYNCVSSGGQCLYSACPIFTRIQGTCYRGRARCCR	2plz	96.1	0.63	3	36	X-RAY DIFFRACTION	N/A	N/A
170	ACYCRIPACIAGEAAYGTCIYQGALWAFCC	2pm1	92.3	0.496	5	30	X-RAY DIFFRACTION	N/A	N/A
171	DCYCRIPACIAGEKKYGTCIYQGKLWAFCC	2pm4	96.3	0.56	5	30	X-RAY DIFFRACTION	N/A	N/A
172	DCYCRIPACIAGEAAYGTCIYQGALWAFCC	2pm5	94.3	0.541	5	30	X-RAY DIFFRACTION	N/A	N/A
173	CPKILKKCRRDSDCPGACICRGNGYCGSGSDGGV	2po8	83.6	0.505	4	34	SOLUTION NMR	water	Water
174	ELDKWASLWNWFNITNWLWYIK	2pv6	83	0.204	3	22	SOLUTION NMR	micelles	DPC micelles
175	KSCCPNTTGRDIYNTCRLGGGSRERCASLSGCKIISASTCPSDYPK	2v9b	91	0.668	4	46	X-RAY DIFFRACTION	N/A	N/A
176	KSCCPSTTGRNIYNTCRLTGSSRETCAKLSGCKIISASTCPSNYPK	3c8p	91.2	0.677	4	46	X-RAY DIFFRACTION	N/A	N/A
177	CGETCTLGTCYTAGCSCSWPVCTRNGVPI	3e4h	89.1	0.474	3	29	X-RAY DIFFRACTION	N/A	N/A
178	ACYCRIPACIAGERRYGTCIYAGRLWAFCC	3h6c	92.6	0.491	3	30	X-RAY DIFFRACTION	N/A	N/A
179	CGGACYCRIPACIAGERRYGTCIYQGRLWAFCC	3hj2	84.2	0.439	3	33	X-RAY DIFFRACTION	N/A	N/A
180	ACYCRIPACIAGERRAGTCIYQGRLWAFCC	3lo1	92	0.482	3	30	X-RAY DIFFRACTION	N/A	N/A
181	ACYCRIPACIAGERRYGTCIAQGRLWAFCC	3lo2	92.6	0.492	3	30	X-RAY DIFFRACTION	N/A	N/A
182	ACYCRIPACIAGERRYGTCIYQGALWAFCC	3lo4	93.1	0.507	3	30	X-RAY DIFFRACTION	N/A	N/A
183	ACYCRIPACIAGERRYGTCIYQGRLWAACC	3loe	91.4	0.473	5	30	X-RAY DIFFRACTION	N/A	N/A
184	ACYCRAPACIAGERRYGTCIYQGRLWAFCC	3lvx	92.6	0.491	3	30	X-RAY DIFFRACTION	N/A	N/A
185	KDRPKKPGLCPPRPQKPCVKECKNDDSCPGQQKCCNYGCKDECRDPIFVG	3ngg	91.8	0.691	4	50	X-RAY DIFFRACTION	N/A	N/A
186	KTCENLADTFRGPCFTDGSCDDHCKNKEHLIKGRCRDDFRCWCTRNC	3psm	96.2	0.734	3	47	X-RAY DIFFRACTION	N/A	N/A
187	ACYCRIPACIAGERRYATCIYQGRLWAFCC	4du0	92.7	0.5	3	30	X-RAY DIFFRACTION	N/A	N/A
188	ACYCRIPACIAGERRAGTCIYQGRLWAACC	4lb1	91.9	0.468	3	30	X-RAY DIFFRACTION	N/A	N/A
189	ACYCRIPACIAGERRAGTCAYQGRAWAACC	4lb7	92.6	0.477	4	30	X-RAY DIFFRACTION	N/A	N/A
190	ACYCRIPACIAGERRYGTCAYQGRLWAFCC	4lbb	91.6	0.468	3	30	X-RAY DIFFRACTION	N/A	N/A
191	ACYCRIPACIAGERRYGTCAYQGRAWAFCC	4lbf	92.8	0.496	3	30	X-RAY DIFFRACTION	N/A	N/A
192	ACQCPDAISGWTHTDYQCHGLENKMYRHVYAICMNGTQVYCRTEWGSSC	4ozk	94.2	0.648	4	49	X-RAY DIFFRACTION	N/A	N/A
193	GLPVCAETCVGGTCNTPGCTCSWPVCTRNG	4ttn	90.9	0.501	3	30	X-RAY DIFFRACTION	N/A	N/A
194	GLPVCGETCVGGTCNTPGCTCSWPACTRNG	4tto	91.3	0.51	3	30	X-RAY DIFFRACTION	N/A	N/A
195	GIGKFLHAAKKFGKAFVAEIMNS	5cgo	94.5	0.296	3	23	X-RAY DIFFRACTION	N/A	N/A
196	LRVRRTLQCSCRRVCRNTCSCIRLSRSTYAS	5gwg	65.9	0.264	4	31	SOLUTION NMR	water	Water
197	FIHHIIGGLFSAGKAIHRLIRRRRR	5h2s	89.5	0.324	3	25	SOLUTION NMR	micelles	DPC micelles
198	IFGAIWPLALGALKNLIK	5j6t	88.1	0.085	3	18	SOLUTION NMR	micelles	DPC micelles
199	DIFGAIWPLALGALKNLIK	5j6v	90.9	0.094	3	19	SOLUTION NMR	micelles	DPC micelles
200	KIFGAIWPLALGALKNLIK	5j6w	88.9	0.089	3	19	SOLUTION NMR	micelles	DPC micelles
201	MGIIAGIIKVIKSLIEQFTGK	5khb	92.5	0.286	5	21	SOLUTION NMR	mixture	Water:TFE mixture
202	QPFIPRPIDTCRLRNGICFPGICRRPYYWIGTCNNGIGSCCARGWRS	5lcs	77.5	0.522	1	47	SOLUTION NMR	water	Water
203	ADDRCYRMCQRYHDRREKKQCKEGCRYG	5lm0	82.9	0.391	3	28	SOLUTION NMR	water	Water
204	RWCVYAYRRVRGVLVRYRRCW	5m9u	93	0.23	3	21	SOLUTION NMR	water	Water
205	RMCKTPSGKFKGYCVNNTNCKNVCRTEGFPTGSCDFHVAGRKCYCYKPCP	5nce	95.6	0.72	3	50	SOLUTION NMR	buffer	Sodium acetate buffer
206	WGWKEVVQNGQTIFSAGQKLGNMVGKIVPLPFG	5ujr	81.8	0.345	3	33	SOLUTION NMR	mixture	Water:TFE mixture
207	KYYGNGVTCGKHSCSVDWGKATTCIINNGALAWATGGHQGNHKC	5ukz	63.1	0.321	1	44	SOLUTION NMR	mixture	Water:TFE mixture
208	GFCWYVCVYRNGVRVCYRRCN	5v0y	95.7	0.26	5	21	SOLUTION NMR	water	Water
209	GFCWYVCARRNGARVCYRRCN	5v11	93	0.231	3	21	SOLUTION NMR	water	Water
210	GGVCPKILQRCRRDSDCPGACICRGNGYCGSGSD	5wov	87.7	0.557	5	34	SOLUTION NMR	buffer	Sodium acetate buffer
211	GGVCPKILQRCRRDSDCPGACICRGNGYCGYPYDVPDYA	5wow	79.6	0.5	3	39	SOLUTION NMR	buffer	Sodium acetate buffer
212	GLGSVFGRLARILGRVIPKV	5x3l	82.6	0.091	3	20	SOLUTION NMR	water	Water
213	GFGCPFNQGKCHRHCRSIRRRGGYCDGFLKQRCVCYRK	5xa6	87.1	0.543	3	38	SOLUTION NMR	water	Water
214	GSKKPVPIIYCNAATGKCQRM	5xol	85.8	0.204	3	21	SOLUTION NMR	water	Water
215	GFAWNVCVYRNGVRVCHRRAN	5y0h	90.9	0.236	2	21	SOLUTION NMR	water	Water
216	GFCWNVCVYRNGVRVCHRRCN	5y0i	93.8	0.242	5	21	SOLUTION NMR	water	Water
217	AFCWNVCVYRNAVRVCHRRCN	5y0j	94.5	0.247	5	21	SOLUTION NMR	water	Water
218	NLCASLRARHTIPQCRKFGRR	5z1y	67.3	0.168	4	21	SOLUTION NMR	buffer	Sodium phosphate buffer
219	AGECVRGRCPGGLCCSKFGFCGSGPAYCGG	5zv6	87.8	0.465	4	30	SOLUTION NMR	water	Water
220	ARECKTESNTFPGICITKPPCRKACISEKFTDGHCSKILRRCLCTKPC	6b55	97.4	0.782	5	48	X-RAY DIFFRACTION	N/A	N/A
221	GSACQFWSCNSSCISRGYRQGYCWGIQYKYCQCQ	6b9w	90.5	0.527	3	34	SOLUTION NMR	water	Water
222	GSACQFWSCNSSCISRGYRQGKCWGIQYKYCQCQ	6bam	90.4	0.529	3	34	SOLUTION NMR	water	Water
223	GMACQFWSCNSSCISRGYRQGKCWGIQYKYCQCY	6bb6	91.3	0.544	3	34	SOLUTION NMR	water	Water
224	GMACQFWSCNSSCISRGYRQGKCWGKYCQCY	6bi5	92.5	0.558	4	31	SOLUTION NMR	water	Water
225	VFQFLGKIIHHVGNFVHGFSHVF	6c41	86.3	0.261	3	23	SOLUTION NMR	mixture	Water:TFE mixture
226	IWLTALKFLGKNLGKLAKQQLAKL	6cl3	84.4	0.227	5	24	SOLUTION NMR	mixture	Water:TFE mixture
227	GLPICGETCLLGKCYTPGCSCRRPVCYKNG	6dhr	93.3	0.524	3	30	SOLUTION NMR	water	Water
228	VCSCRLVFCRRTELRVGNCLIGAVSFTYCCTRV	6dmm	91.3	0.506	4	33	X-RAY DIFFRACTION	N/A	N/A
229	VCSCRLVFCRRTELRVGNCLIGGVSFAYCCTRV	6dmq	92.6	0.529	5	33	X-RAY DIFFRACTION	N/A	N/A
230	RTCQSQSHRFRGPCLRRSNCANVCRTEGFPGGRCRGFRRRCFCTTHC	6dmz	91.8	0.656	3	47	SOLUTION NMR	water	Water
231	GIGAVLKVLTTGLPALISWIKRKRQQ	6dst	89	0.33	3	26	SOLUTION NMR	buffer	Potassium phosphate buffer
232	FLPIIINLKALAALAKKIL	6duu	87.4	0.09	3	19	SOLUTION NMR	micelles	SDS micelles
233	ACDTATCVTHRLAGLLSRSGGVVKNNFVPTNVGSKAF	6e3y	70.9	0.325	2	37	ELECTRON MICROSCOPY	N/A	N/A
234	TKLTEEEKNRLNFLKKISQRYQKFALPQYLK	6fs4	80.6	0.393	5	31	SOLUTION NMR	mixture	Water:TFE mixture
235	GIGGKILSGLKTALKGAAKELASTYLH	6hz2	87.3	0.332	3	27	SOLUTION NMR	mixture	Water:TFE mixture
236	GFGCNGPWNEDDLRCHNHCKSIKGYKGGYCAKGGFVCKCY	6k50	86	0.517	1	40	SOLUTION NMR	mixture	Water:TFE mixture
237	GFGCNGPWQEDDLKCHNHCKSIKGYKGGYCAKGGFVCKCY	6k51	87.1	0.548	5	40	SOLUTION NMR	water	Water
238	RRTCRCRFGRCFRRESYSGSCNINGRIFSLCCR	6kra	89.5	0.466	3	33	SOLUTION NMR	water	Water
239	ACQCPDAISGWTHTDYQCHGLEKKMYRHVYAICMNGSQVYCRTEWGSSC	6lwy	94.3	0.648	4	49	X-RAY DIFFRACTION	N/A	N/A
240	ARQCKAESNTFTGICIAKPPCRQACIREKFTDGHCSKVLRRCLCTKRC	6mry	97.2	0.778	3	48	X-RAY DIFFRACTION	N/A	N/A
241	KTCENLSGTFKGPCIPDGNCNKHCRNNEHLLSGRCRDDFRCWCTNRC	6nom	93.4	0.705	3	47	SOLUTION NMR	water	Water
242	AGKETIRQYLKNEIKKKGRKAVIAW	6o8j	86.3	0.347	5	25	SOLUTION NMR	water	Water
243	AGKEKIRKKLKNEIKKKGRKAVIAW	6o8p	87.4	0.346	5	25	SOLUTION NMR	water	Water
244	AWKEKIRKKLKNEIKKKGRKAVIAW	6o8r	83.5	0.285	5	25	SOLUTION NMR	water	Water
245	AGKEKIRKKLKNEIKKKWRKAVIAW	6o8s	88.5	0.305	3	25	SOLUTION NMR	water	Water
246	AWKEKIRKKLKNEIKKKWRKAVIAW	6o8t	88.9	0.303	3	25	SOLUTION NMR	water	Water
247	FETLRGDERILSILRHQNLLKELQD	6r2x	89.1	0.386	5	25	SOLUTION NMR	buffer	Sodium phosphate buffer
248	GWGSFFRRAAHVGRHVGRAALTHYL	6rsf	83.1	0.288	3	25	SOLUTION NMR	micelles	SDS micelles
249	GWGSFFKKAAHAGKHAGKAALTHYL	6rsg	80	0.289	5	25	SOLUTION NMR	micelles	SDS micelles
250	GRRKRKWLRRIGKGVKIIGGAALDHL	6ry9	81.4	0.256	3	26	SOLUTION NMR	micelles	SDS micelles
251	WLRRIGKGVKIIGGAALDHL	6ryq	80.1	0.074	5	20	SOLUTION NMR	micelles	SDS micelles
252	FLGALIKGAIHGGRFIHGMIQNHH	6rz1	90.6	0.257	3	24	SOLUTION NMR	micelles	SDS micelles
253	GWGSIFKHGRHAAKHIGHAAVNHYL	6rzc	86.3	0.302	5	25	SOLUTION NMR	micelles	SDS micelles
254	GKGRWLERIGKAGFIIIGGALDHL	6s2d	91.1	0.278	5	24	SOLUTION NMR	micelles	SDS micelles
255	KTCENLADTYKGPCFTTGSCDDHCKNKEHLRSGRCRDDFRCWCTKNC	6vpn	96.7	0.748	3	47	SOLUTION NMR	water	Water
256	GIGDILKNLAKAAGKAALHAVGESL	6wpo	92.3	0.375	4	25	SOLUTION NMR	micelles	DPC micelles
257	RTCESQSHKFKGPCLRASNCANVCKTEGFHGGKCRGFRRRCFCTKHC	7c2p	94	0.688	3	47	X-RAY DIFFRACTION	N/A	N/A
258	RVCESQSHKFEGACMGDHNCALVCRNEGFSGGKCKGLRRRCFCTKLC	7c31	91.4	0.652	5	47	X-RAY DIFFRACTION	N/A	N/A
259	GLPVCGETCVGGTCNTPGCVCSWPVCTRN	7k7x	92	0.517	3	29	SOLUTION NMR	water	Water
260	AIPCGESCVYIPCISVVIGCSCRNKVCYR	7kpd	92.3	0.488	3	29	SOLUTION NMR	water	Water
261	MITISTMLQFGLFLIALIGLVIKLIELSNKK	7ns1	94.5	0.519	5	31	SOLUTION NMR	mixture	Water:Isopropanol mixture
